# Supplementary material for: Number of Candidate Effector Genes in Accessory Genomes Differentiates Pathogenic From Endophytic Fusarium oxysporum Strains
Source: Front Plant Sci. 2021 Nov 29;12:761740. doi: 10.3389/fpls.2021.761740 (PMC8666634; doi:10.3389/fpls.2021.761740)
Supplement: Supplementary Table 1 — Statistics of de novo genome assemblies generated in this study. [file Table_1.XLSX]

## Sheet: Assembly statistics 
Genome	Contings or scaffolds	GC-content (%)	Coverage (X)*	N50	Longest Sequence	Assembly size (bp)	Unknown bases (Ns)	Assembly size (Mb)	Estimated genome size **	Simple repeats and low complexity (bp)	Simple repeats and low complexity (%)	Transposable elements (bp)	Transposable elements (%)	BUSCO completeness(%)	GenBank accession	Core DNA (bp)	Acessory DNA (bp)
Fo1	723	47.62	115	1230545	3032645	49057628	28092	49.0576	51.5067	314230	0.640532	816984	1.66536	99	GCA_014325315.1	37679302	11378326
Fo2	616	47.54	116	772243	2600891	47452269	23404	47.4523	48.9164	310719	0.654803	904847	1.90686	99	GCA_014325295.1	37068700	10383569
Fo3	2910	47.3	96	398252	2175737	56720539	99338	56.7205	60.1124	356740	0.628943	1884766	3.3229	99	GCA_014325235.1	37576101	19144438
Fo4	1911	47.44	104	497672	2310656	53665476	78479	53.6655	55.7533	333063	0.620628	1632469	3.04194	99.1	GCA_014325225.1	37529999	16135477
Fo5	2423	47.66	111	364712	3064382	53595403	94022	53.5954	57.0076	323359	0.603333	1473383	2.74908	98.9	GCA_014325205.1	37483843	16111560
Fo6	2072	47.54	117	393792	1756999	52559635	89713	52.5596	56.5151	339694	0.646302	1442045	2.74364	99	GCA_014325215.1	37135742	15423893
Fo7	1809	47.23	103	389867	2596307	53356920	70785	53.3569	56.5416	349383	0.654804	1501501	2.81407	99.1	GCA_014325185.1	37504798	15852122
Fo8	1464	47.65	94	715808	2008004	50530900	52962	50.5309	53.4591	319773	0.632827	1197959	2.37075	99	GCA_014325135.1	37085277	13445623
Fo9	530	47.62	117	1173989	2949657	47801732	17357	47.8017	50.5432	301116	0.629927	603420	1.26234	99	GCA_014325125.1	37180582	10621150
Fo10	1683	47.54	108	496960	1927145	52686132	53148	52.6861	55.0652	342939	0.650909	1423510	2.70187	98.9	GCA_014325095.1	37096043	15590089
Fo11	1086	47.48	123	931241	2915915	49874305	49442	49.8743	52.2973	326894	0.655436	1231571	2.46935	98.8	GCA_014325045.1	37078872	12795433
Fo12	1218	47.54	104	731780	2208072	50199843	41006	50.1998	52.133	318710	0.634882	1228090	2.4464	98.9	GCA_014325035.1	37051731	13148112
Fo13	1253	47.19	107	480866	1745054	50841866	61837	50.8419	53.1879	342911	0.674466	1355647	2.6664	99	GCA_014325015.1	37444151	13397715
Fo14	2740	47.82	117	315915	2549219	53567988	103552	53.568	56.5495	318500	0.594572	1259257	2.35076	98.9	GCA_014324985.1	37703492	15864496
Fo15	1047	47.51	116	1006048	3275817	48650856	43321	48.6509	50.3402	313415	0.644213	1070187	2.19973	98.9	GCA_014324975.1	37095046	11555810
Fo16	1476	47.41	110	622722	2107662	51702916	74791	51.7029	54.4225	330970	0.640138	1283380	2.48222	99	GCA_014325065.1	37737994	13964922
Fo17	1190	47.44	109	700658	3045916	51758095	55805	51.7581	53.9795	330097	0.637769	1435459	2.7734	99	GCA_014324955.1	37723029	14035066
Fo18	2144	47.31	114	540952	3104425	54920127	87657	54.9201	57.8447	349495	0.63637	1553304	2.8283	99.2	GCA_014324935.1	37753251	17166876
Fo20	1346	47.54	122	674277	4116031	52148302	66764	52.1483	54.7436	329990	0.632791	1253359	2.40345	98.9	GCA_014324905.1	37679237	14469065
Fo24	2026	47.07	104	526880	2581107	52647048	112674	52.647	55.9689	356712	0.677554	1362061	2.58716	99	GCA_014337855.1	37395976	15251072
Fo25	1492	47.77	83	317511	1348219	50470764	69473	50.4708	50.841	308918	0.612073	1214627	2.4066	99.1	GCA_014324895.1	37607935	12862829
Fo26	1677	47.24	86	775439	4392223	52287225	118621	52.2872	55.4541	335436	0.641526	1379150	2.63764	99	GCA_014324865.1	37640439	14646786
Fo28	1834	47.37	77	758569	3395105	52067767	135553	52.0678	54.6814	331859	0.63736	1304205	2.50482	99	GCA_014324835.1	37649218	14418549
Fo29	1176	47.52	94	756871	2295023	50651040	68033	50.651	51.955	323610	0.638901	1397262	2.7586	99	GCA_014324805.1	37681325	12969715
Fo35	616	47.58	91	899270	2688300	48106679	35345	48.1067	50.7409	302174	0.628133	897750	1.86616	98.9	GCA_014324675.1	37673430	10433249
Fo39	1175	47.32	89	444053	1743896	50082841	75193	50.0828	51.8803	330013	0.658934	1062223	2.12093	99	GCA_014324795.1	37503918	12578923
Fo41	1576	47.4	90	763375	4548808	51290483	108002	51.2905	53.8824	320657	0.625178	1236657	2.41108	99	GCA_014324775.1	37569955	13720528
Fo44	856	47.4	91	962939	2494075	49289536	69381	49.2895	51.3296	316155	0.641424	1081736	2.19466	99	GCA_014324715.1	37542696	11746840
Fo45	1443	47.34	84	507897	2160331	50461054	80033	50.4611	52.5888	323457	0.641003	1142893	2.2649	99	GCA_014324665.1	37508324	12952730
Fo46	948	47.4	98	870807	2853826	50681299	61017	50.6813	52.7713	320883	0.633139	1327718	2.61974	98.9	GCA_014324645.1	37694983	12986316
Fo48	1272	47.31	91	678142	2420819	51516727	63376	51.5167	54.3491	337886	0.655876	1394047	2.70601	99	GCA_014324625.1	37728436	13788291
Fo49	1272	47.32	91	903812	2805426	51488770	78036	51.4888	54.1156	336888	0.654294	1407014	2.73266	99	GCA_014324585.1	37681502	13807268
Fo52	1523	47.56	82	532691	2197936	51202205	96276	51.2022	54.2215	316557	0.618249	1461465	2.8543	99.2	GCA_014324595.1	37679945	13522260
Fo53	1307	47.63	90	479859	2329136	50378143	83142	50.3781	53.7783	306497	0.608393	1419093	2.81688	99.1	GCA_014324575.1	37684529	12693614
Fo54	1094	47.56	85	991905	3816211	50816590	62526	50.8166	53.084	316763	0.623346	1284885	2.52848	99	GCA_014324555.1	37658547	13158043
Fo57	779	47.6	87	1103867	3642521	49874414	50821	49.8744	53.1771	315716	0.633022	1182022	2.37	98.9	GCA_014324505.1	37764487	12109927
Fo58	672	47.61	83	1324670	4359921	49814708	39822	49.8147	52.29	317263	0.636886	1150432	2.30942	98.9	GCA_014324495.1	37758638	12056070
Fo59	680	47.62	119	1523090	4480873	48804255	39956	48.8043	51.3158	310157	0.635512	789649	1.61799	99	GCA_014324765.1	37663439	11140816
Fo63	1510	47.69	91	516130	3756710	52317076	88275	52.3171	54.2322	319441	0.610586	1404032	2.6837	99.1	GCA_014324455.1	37674677	14642399
Fo65	2173	47.37	81	364480	2874926	53588382	128841	53.5884	57.162	350619	0.654282	1502664	2.80409	99	GCA_014324465.1	37177961	16410421
Fo68	1371	47.31	78	484144	2420864	51504407	64972	51.5044	54.8959	338494	0.657214	1397210	2.7128	99	GCA_014324755.1	37731534	13772873
Fo69	1419	47.4	97	366920	1407368	53255279	69633	53.2553	55.4428	338092	0.634852	1738800	3.26503	98.9	GCA_014324425.1	37686738	15568541
Fo74	1912	47.54	80	406712	2326688	52538187	119358	52.5382	56.3598	324359	0.617378	1547770	2.94599	99	GCA_014324745.1	37696328	14841859
Fo75	721	47.59	90	1029195	4633021	49824212	51652	49.8242	52.5467	316744	0.635723	1171737	2.35174	98.9	GCA_014324435.1	37777149	12047063
Fo47***	60	47.95	-	2117445	4719388	50246232	0	-	-	313963	0.624849	1228705	2.44537	98.9	GCA_014324445.1	37807300	12438932
* coverage defined as median read depth on contigs > 100 kb
** genome size estimated by dividing the number of mapped reads by the coverage
*** Genome sequenced by PacBio instead of Illumina
