# Supplementary material for: Number of Candidate Effector Genes in Accessory Genomes Differentiates Pathogenic From Endophytic Fusarium oxysporum Strains
Source: Front Plant Sci. 2021 Nov 29;12:761740. doi: 10.3389/fpls.2021.761740 (PMC8666634; doi:10.3389/fpls.2021.761740)
Supplement: Supplementary Table 2 — Overview of the genome assemblies collected from GenBank and used in this study. All genomes were used for phylogenetic analysis and determining core/accessory material unless otherwise stated. [file Table_2.XLSX]

## Sheet: Overview Genbank assemblies
	Strain	Race	f.sp.	Isolated from	Genebank accession	Effector pipeline	Accessory analysis	Core	Acessory	Comments
1	Forc016	-	radicis-cucumerinum	Cucumis sativa	GCA_001702695.2	yes	excluded	38088102	14820191	Is assembled based on SMRT sequencing reads
2	Foa1	-	conglutinans	Brassica sp.	GCA_001519035.1	no	pathogen	35200756	17342008
3	FoA13	-	-	Allium cepa	GCA_003615115.1	no	endophyte	37652196	17135622
4	FoA28	-	-	Allium cepa	GCA_003615155.1	no	endophyte	37705119	15333066
5	Foa58385	-	conglutinans	Brassica sp.	GCA_002711385.1	no	pathogen	37343247	18512206
6	FoaFGL03-6	-	conglutinans	Brassica sp.	GCA_002711405.2	no	pathogen	36793529	24869260
7	FoaPHW808	2	conglutinans	Brassica sp.	GCA_000260215.2	yes	pathogen	37321842	16253510
8	FoaPHW815	-	raphani	Raphanus sp.	GCA_000260235.2	yes	pathogen	37075400	16423962
9	Foc001	-	cucumerinum	Cucumis sativa	GCA_001702515.1	yes	pathogen	37650913	13743432
10	Foc011	-	cucumerinum	Cucumis sativa	GCA_001703455.1	yes	pathogen	36929036	11730605
11	Foc013	-	cucumerinum	Cucumis sativa	GCA_001702495.1	yes	pathogen	37039777	11853135
12	Foc015	-	cucumerinum	Cucumis sativa	GCA_001702575.1	yes	pathogen	37635810	14347206
13	Foc018	-	cucumerinum	Cucumis sativa	GCA_001702545.1	yes	pathogen	37627849	19808077
14	Foc021	-	cucumerinum	Cucumis sativa	GCA_001702555.1	yes	pathogen	37629981	19227423
15	Foc030	-	cucumerinum	Cucumis sativa	GCA_001702615.1	yes	pathogen	37643176	19159893
16	Foc035	-	cucumerinum	Cucumis sativa	GCA_001702655.1	yes	pathogen	37614272	13995558
17	Foc037	-	cucumerinum	Cucumis sativa	GCA_001702635.1	yes	pathogen	35805652	12590665	Does not have what is known as chromosome 12 in Fol4287.
18	FoCB3	-	-	Allium cepa	GCA_003615165.1	no	endophyte	37668069	12847430
19	Focep125	-	cepae	Allium cepa	GCA_003615095.1	no	pathogen	37613061	13794671
20	FocepA23	-	cepae	Allium cepa	GCA_003615075.1	no	pathogen	37605076	13404625
21	FocepFus1	-	cepae	Allium cepa	GCA_003615085.1	no	excluded	37679160	15746628	Is assembled based on combination of SMRT and Illumina sequencing reads
22	Focic38-1	-	ciceris	Cicer sp.	GCA_001757345.1	no	pathogen	35668000	19145009
23	FoCotton (NRRL25433)	-	vasinfectum	Gossypium sp.	GCA_000260175.2	yes	pathogen	37261065	15653349
24	FoCS5870	-	-	Triticum aestivum	GCA_002894245.1	no	excluded	37772734	13608653	Is labeled non-pathogenic on Genbank BioSample, but no reports on bioassays that tested pathogenicity on any host.
25	Focub1 (FocubN2)	1	cubense	Musa sp.	GCA_000350345.1	yes	pathogen	37535030	10122387
26	FocubC1HIR9889	4	cubense	Musa sp.	GCA_001696625.1	no	pathogen	37106276	9628830
27	FocubII5	TR4	cubense	Musa sp.	GCA_000260195.2	yes	pathogen	36960994	9592786
28	FoglaG14	-	gladioli	Gladiolus sp.	GCA_002233915.1	no	pathogen	37222248	19105858
29	FoglaG2	-	gladioli	Gladiolus sp.	GCA_002233895.1	no	pathogen	37637633	15589714
30	FoglaG76	-	gladioli	Gladiolus sp.	GCA_002234195.1	no	pathogen	37391716	18740343
31	FoHDV247	-	pisi	Pisium sp.	GCA_000260075.2	yes	pathogen	37733576	17454640
32	Fol002	2	lycopersici	Solanum lycopersicum	GCA_001703355.1	yes	pathogen	37592623	14136051
33	Fol004	1	lycopersici	Solanum lycopersicum	GCA_001702875.1	yes	pathogen	37675477	14206771
34	Fol007	2	lycopersici	Solanum lycopersicum	GCA_001702905.1	yes	pathogen	37613434	13709326
35	Fol014	1	lycopersici	Solanum lycopersicum	GCA_001702945.1	yes	pathogen	37660152	12401145
36	Fol016	1	lycopersici	Solanum lycopersicum	GCA_001702995.1	yes	pathogen	37677790	11897310
37	Fol018	2	lycopersici	Solanum lycopersicum	GCA_001702955.1	yes	pathogen	37664255	11288134
38	Fol026	3	lycopersici	Solanum lycopersicum	GCA_001702935.1	yes	pathogen	37585697	14218924
39	Fol029	3	lycopersici	Solanum lycopersicum	GCA_001703025.1	yes	pathogen	37651293	12360484
40	Fol038	3	lycopersici	Solanum lycopersicum	GCA_001703015.1	yes	pathogen	37485479	13798561
41	Fol069	2	lycopersici	Solanum lycopersicum	GCA_001703035.1	yes	pathogen	37445432	11676862
42	Fol072	2	lycopersici	Solanum lycopersicum	GCA_001703065.1	yes	pathogen	37693211	12362358
43	Fol073	2	lycopersici	Solanum lycopersicum	GCA_001703085.1	yes	pathogen	37698588	14087035
44	Fol074	3	lycopersici	Solanum lycopersicum	GCA_001703105.1	yes	pathogen	37624475	13907789
45	Fol075	-	lycopersici	Solanum lycopersicum	GCA_001703135.1	yes	pathogen	37737464	12911730
46	Fol4287	2	lycopersici	Solanum lycopersicum	GCA_003315725.1	yes	excluded	37524999	16393968	Is assembled based on Sanger sequencing reads and an optical map
47	Folag001	-	lagenariae	Lagenaria siceraria	GCA_002234185.1	no	pathogen	37723956	16147957
48	Folag002	-	lagenariae	Lagenaria siceraria	GCA_002234165.1	no	pathogen	37724001	18363836
49	Folag004	-	lagenariae	Lagenaria siceraria	GCA_002234135.1	no	pathogen	37602389	10345069
50	Folag005	-	lagenariae	Lagenaria sp.	GCA_002233875.1	no	pathogen	37727214	16918997
51	FolD11 (FolCA3)	3	lycopersici	Solanum lycopersicum	GCA_003977725.1	no	excluded	38064200	19217778	Is assembled based on SMRT sequencing reads
52	FolilFol39	-	lilii	Lilium sp.	GCA_002234115.1	no	pathogen	37725828	15655597
53	FolMN25	3	lycopersici	Solanum lycopersicum	GCA_000259975.2	yes	pathogen	37305142	11332256
54	Foluf001	-	luffae	Luffa spp.	GCA_002234105.1	no	pathogen	37597950	10609505
55	Foluf002	-	luffae	Luffa sp.	GCA_002233855.1	no	pathogen	37597142	10672091
56	Fom001*	-	melonis	-	GCA_002318975.1	no	excluded	38459683	22244319	Is assembled based on SMRT sequencing reads
57	Fom004	-	melonis	Cucumis melo	GCA_001703215.1	yes	pathogen	37853859	19873036
58	Fom005	-	melonis	Cucumis melo	GCA_001703205.1	yes	pathogen	37769789	16729108
59	Fom006	-	melonis	Cucumis melo	GCA_001703255.1	yes	pathogen	37546887	15214647
60	Fom009	-	melonis	Cucumis melo	GCA_001703265.1	yes	pathogen	37329849	20408548
61	Fom010	-	melonis	Cucumis melo	GCA_001703305.1	yes	pathogen	36766603	16907984
62	Fom011	-	melonis	Cucumis melo	GCA_001703295.1	yes	pathogen	37424673	15504192
63	Fom012	-	melonis	Cucumis melo	GCA_001703345.1	yes	pathogen	37635955	14965925
64	Fom013	-	melonis	Cucumis melo	GCA_001703335.1	yes	pathogen	37160317	14736853
65	Fom016	-	melonis	Cucumis melo	GCA_001703365.1	yes	pathogen	37645858	15296638
66	Fomed5190a		medicaginis	Medicago sativa	GCA_001652425.1	no	pathogen	37574492	13565440
67	Fomel001	-	melongenae	Solanum melongena	GCA_002234085.1	no	pathogen	37639462	14669828
68	FoMN14	-	not pathogenic	Solanum lycopersicum	GCA_001703125.1	yes	endophyte	37636071	11360809
69	Fomom001	-	momordicae	Momordica sp.	GCA_002233865.1	no	pathogen	37719938	13799194
70	Fomom004	-	momordicae	Momordica sp.	GCA_002233795.1	no	pathogen	37716139	13321528
71	Fon002	-	niveum	Citrullus lanatus	GCA_001702745.1	yes	pathogen	37629265	14345042
72	Fon005	-	niveum	Citrullus lanatus	GCA_001702505.1	yes	pathogen	37444834	17273358
73	Fon010	-	niveum	Citrullus lanatus	GCA_001702785.1	yes	pathogen	37684053	17787446
74	Fon013	-	niveum	Citrullus lanatus	GCA_001702775.1	yes	pathogen	37674903	16541060
75	Fon015	-	niveum	Citrullus lanatus	GCA_001702795.1	yes	pathogen	37310297	14748712
76	Fon019	-	niveum	Citrullus lanatus	GCA_001702715.1	yes	pathogen	36812636	12911914
77	Fon020	-	niveum	Citrullus lanatus	GCA_001702805.1	yes	pathogen	37664919	17462623
78	Fon021	-	niveum	Citrullus lanatus	GCA_001702865.1	yes	pathogen	37691144	17107956
79	Fon037	-	niveum	Citrullus lanatus	GCA_001702845.1	yes	pathogen	37589680	13704237
80	FoNa5	-	narcissi	Narcissus sp.	GCA_002233775.1	no	pathogen	37755965	17769024
81	Fonic001	-	nicotianae	Nicotiana sp.	GCA_002234055.1	no	pathogen	37771601	12389595
82	Fonic003	-	nicotianae	Nicotiana sp.	GCA_002234045.1	no	pathogen	37749299	12250452
83	Fonic010	-	nicotianae	Nicotiana sp.	GCA_002233785.1	no	pathogen	37754647	12013538
84	Fonic012	-	nicotianae	Nicotiana sp.	GCA_002234015.1	no	pathogen	37664153	13376898
85	FoPG	-	-	Allium cepa	GCA_003615185.1	no	pathogen	37776974	12515246
86	FophyKOD886	-	physalis	Physalis sp.	GCA_002233995.1	no	pathogen	37417040	9816638
87	FophyKOD887	-	physalis	Physalis sp.	GCA_002233985.1	no	pathogen	37475848	12934802
88	FophyKOD888	-	physalis	Physalis sp.	GCA_002233955.1	no	pathogen	37502938	21917833
89	Forc024	-	radicis-cucumerinum	Cucumis sativa	GCA_001702725.1	yes	pathogen	37648258	11697286
90	Forc031	-	radicis-cucumerinum	Cucumis sativa	GCA_001702645.1	yes	pathogen	37652762	11686467
91	ForlCL57	-	radicis-lycopersici	Solanum lycopersicum	GCA_000260155.3	yes	pathogen	37625327	11733962
92	FoSC3a	-	-	Homo sapiens	GCA_000271745.2	yes	pathogen	37186571	10719732
93	FoTu58	-	-	Tulipa sp.	GCA_002233935.1	no	pathogen	37482062	12921577
94	FoTu67	-	tulipae	Tulipa sp.	GCA_002233805.1	no	pathogen	37600454	16742853
95	FoUSFDA10	-	-	Arachis sp.	GCA_003709395.1	no	pathogen	37626642	8626059	Isolated from Moldy peanuts, not labeled as a pathogen on Genbank, possibly post-harvest pest rather than a pathogen
96	FoUSFDA11	-	-	Arachis sp.	GCA_003705045.1	no	pathogen	37689196	8592893	Isolated from Moldy peanuts, not labeled as a pathogen on Genbank, possibly post-harvest pest rather than a pathogen
97	FoUSFDA16	-	-	Arachis sp.	GCA_003705035.1	no	excluded	37482283	6966694	Isolated from Moldy peanuts, not labeled as a pathogen on Genbank, possibly post-harvest pest rather than a pathogen
98	FoUSFDA9	-	-	Arachis sp.	GCA_003704975.1	no	excluded	37656825	9793826	Isolated from Moldy peanuts, not labeled as a pathogen on Genbank, possibly post-harvest pest rather than a pathogen
99	FoV64-1	-	-	Oryzae sp.	GCA_900096695.1	no	pathogen	37661070	11424520
100	FoVEG01C1-ISS	-	not pathogenic	Zinnia hybrida	GCA_003025205.1	no	pathogen	37093898	11693133
101	FoVEG01C2-ISS	-	not pathogenic	Zinnia hybrida	GCA_003025235.1	no	pathogen	37175999	11301236
102	FoxyAC1-1.0	-	-	Seeds	GCA_000733055.2	no	excluded	37623666	12926567	Not labeled as a pathogen on Genbank, nor isolated from diseased organism
103	Fo47	-	not pathogenic	-	GCA_014324445.1	yes	excluded	37807300	12438932	Is assembled based on SMRT sequencing reads
* Not included in SIX gene phylogenies, please note that for the effector prediction pipeline (van Dam et al. 2016) an older version was used: GCA_000260495.2
Only included in effector analyses (including SIX gene phylogenies) (van Dam et al. 2016)
	Fo5176	-	conglutinans	Brassica sp.	GCA_000222805.1	yes	no	-	-
	Focub4 (FocubB2)	4	cubense	Musa sp.	GCA_000350365.1	yes	no	-	-
All genomes were used for phylogenetic analysis and determining core/accessory material unless otherwise stated.
