# Supplementary material for: Number of Candidate Effector Genes in Accessory Genomes Differentiates Pathogenic From Endophytic Fusarium oxysporum Strains
Source: Front Plant Sci. 2021 Nov 29;12:761740. doi: 10.3389/fpls.2021.761740 (PMC8666634; doi:10.3389/fpls.2021.761740)
Supplement: Supplementary Table 3 — Overview of mimps (single and complete TIR motifs) and number of candidate effector genes (located on the core and accessory regions) among endophytic and pathogenic isolates used for the hierarchical clustering. [file Table_3.XLSX]

## Sheet: mimps and candidate effectors 
Strain	Complete mimps (nr.)	Single TIR motifs (nr.)	Total effectors (nb)	Core effectors (nb)	Acessory effectors (nb)
Fo1	5	18	79	54	25
Fo2	5	5	72	51	21
Fo3	37	69	91	53	38
Fo4	13	32	79	53	26
Fo5	17	14	78	53	25
Fo6	8	8	77	52	25
Fo7	9	16	81	52	29
Fo8	12	19	79	52	27
Fo9	4	7	68	52	16
Fo10	16	17	89	52	37
Fo11	7	7	75	52	23
Fo12	8	7	74	52	22
Fo13	3	13	77	52	25
Fo14	17	48	93	53	40
Fo15	9	7	79	52	27
Fo16	9	12	74	53	21
Fo17	8	28	78	53	25
Fo18	10	15	78	53	25
Fo20	11	11	79	54	25
Fo24	12	29	76	53	23
Fo25	9	14	75	53	22
Fo26	9	19	77	52	25
Fo28	15	23	80	53	27
Fo29	9	9	74	54	20
Fo35	4	10	73	54	19
Fo39	6	10	77	53	24
Fo41	10	13	75	53	22
Fo44	5	10	73	53	20
Fo45	5	13	77	53	24
Fo46	6	11	74	53	21
Fo48	5	21	78	53	25
Fo49	7	18	77	52	25
Fo52	10	14	78	53	25
Fo53	8	17	78	53	25
Fo54	6	25	75	54	21
Fo57	4	19	73	53	20
Fo58	4	17	71	53	18
Fo59	7	10	77	54	23
Fo63	8	16	77	54	23
Fo65	10	14	73	52	21
Fo68	5	21	78	53	25
Fo69	20	22	82	53	29
Fo74	13	13	83	53	30
Fo75	4	18	72	53	19
Fo47*	7	17	77	54	23
Fo5176	44	59	91	48	43
FoaPHW808	39	53	88	50	38
Foc001	42	50	99	53	46
Foc011	41	36	96	52	44
Foc013	38	44	97	52	45
Foc015	39	52	98	52	46
Foc018	38	62	104	53	51
Foc021	36	67	104	53	51
Foc030	34	66	104	53	51
Foc035	50	44	101	53	48
Foc037	46	49	93	48	45
FoCotton (NRRL25433)	48	49	96	52	44
Focub1 (FocubN2)	17	22	79	53	26
Focub4 (FocubB2)	20	14	84	52	32
FocubII5	11	19	82	52	30
FoHDV247	24	36	95	53	42
Fol002	27	60	98	54	44
Fol004	27	65	99	54	45
Fol007	33	48	95	52	43
Fol014	26	61	98	54	44
Fol016	24	56	97	54	43
Fol018	20	47	93	54	39
Fol026	25	64	98	54	44
Fol029	25	56	95	53	42
Fol038	28	59	94	51	43
Fol069	25	52	96	54	42
Fol072	23	59	96	54	42
Fol073	25	54	97	53	44
Fol074	27	61	95	53	42
Fol075	26	47	95	53	42
Fol4287	35	57	98	54	44
FolMN25	29	41	94	54	40
Fom001	42	51	107	54	53
Fom004	34	62	104	53	51
Fom005	35	58	104	53	51
Fom006	32	53	101	53	48
Fom009	43	58	98	52	46
Fom010	33	66	102	52	50
Fom011	31	50	101	53	48
Fom012	30	57	101	52	49
Fom013	36	50	101	52	49
Fom016	32	59	102	52	50
Fon002	33	33	100	53	47
Fon005	30	90	110	52	58
Fon010	37	79	109	53	56
Fon013	33	92	110	53	57
Fon015	24	44	103	53	50
Fon019	24	44	105	53	52
Fon020	48	82	111	53	58
Fon021	28	91	109	53	56
Fon037	31	40	98	52	46
Forc016	35	27	93	54	39
Forc024	26	29	92	54	38
Forc031	25	31	91	53	38
ForapPHW815	53	70	96	51	45
ForlCL57*	10	10	76	53	23
FoSC3a*	4	8	70	52	18
FoMN14*	4	8	69	53	16
In red: Isolates that have a different mimp and TIR motif number than previously identified by van Dam et al., 2016. Not used for the mimp estimation
* Isolates excluded from effector prediction estimation because we did not perform bioassays with them.
Forc016, Fol4287, Fo47 excluded from the mimp graph
Overview of mimp’s (single and complete TIR motifs) and number of candidate effector genes (located on the core and accessory regions) among endophytic and pathogenic isolates used for the hierarchical clustering.
