# Supplementary material for: Number of Candidate Effector Genes in Accessory Genomes Differentiates Pathogenic From Endophytic Fusarium oxysporum Strains
Source: Front Plant Sci. 2021 Nov 29;12:761740. doi: 10.3389/fpls.2021.761740 (PMC8666634; doi:10.3389/fpls.2021.761740)
Supplement: Supplementary Table 4 — Distribution of SIX genes and MAT type among endophytic strains. Effector candidate genes present in the endophyte genomes are highlighted in yellow. Presence of a mimp in proximity to their open reading frame is outlined by red borders. [file Table_4.XLSX]

## Sheet: SIX genes and MAT type
Strain	SIX1	SIX2	SIX3	SIX4	SIX5	SIX6	SIX7	SIX8	SIX9	SIX10	SIX11	SIX12	SIX13	SIX14	AvrFom2	MAT type
Fo1	0	0	0	0	0	0	0	0	0	0	0	0	0	0	0	MAT2
Fo2	0	0	0	0	0	0	0	0	0	0	0	0	0	0	0	MAT2
Fo3	1	0	0	0	0	0	0	0	0	0	0	0	0	1	0	MAT2
Fo4	0	0	0	0	0	0	0	0	0	0	0	0	0	0	0	MAT2
Fo5	0	0	0	0	0	0	0	0	0	0	0	0	0	0	0	MAT2
Fo6	0	0	0	0	0	0	0	0	0	0	0	0	0	0	0	MAT1
Fo7	0	0	0	0	0	0	0	0	0	0	0	0	0	0	0	MAT1
Fo8	0	1	0	0	0	0	0	0	0	0	0	0	0	0	0	MAT2
Fo9	0	0	0	0	0	0	0	0	0	0	0	0	0	0	0	MAT1
Fo10	0	1	0	0	0	0	0	0	1	0	0	0	0	0	0	MAT1
Fo11	0	0	0	0	0	0	0	0	0	0	0	0	0	0	0	MAT2
Fo12	0	0	0	0	0	0	0	0	0	0	0	0	0	0	0	MAT2
Fo13	0	0	0	0	0	0	0	0	0	0	0	0	0	0	0	MAT2
Fo14	0	0	0	0	0	1	0	0	1	0	0	0	0	0	1	MAT2
Fo15	0	1	0	0	0	0	0	0	0	0	0	0	0	0	0	MAT2
Fo16	0	0	0	0	0	0	0	0	1	0	0	0	0	0	0	MAT2
Fo17	0	0	0	0	0	0	0	0	1	0	0	0	0	0	0	MAT1
Fo18	0	0	0	0	0	0	0	0	1	0	0	0	0	0	0	MAT2
Fo20	0	0	0	0	0	0	0	0	0	0	0	0	0	0	0	MAT1
Fo24	0	0	0	0	0	0	0	0	1	0	0	0	0	0	0	MAT1
Fo25	0	0	0	0	0	0	0	0	0	0	0	0	0	0	0	MAT2
Fo26	0	0	0	0	0	0	0	0	1	0	0	0	0	0	0	MAT1
Fo28	0	0	0	0	0	0	0	0	0	0	0	0	0	1	0	MAT1
Fo29	0	0	0	0	0	0	0	0	0	0	0	0	0	0	0	MAT1
Fo35	0	0	0	0	0	0	0	0	0	0	0	0	0	0	0	MAT2
Fo39	0	0	0	0	0	1	0	0	0	0	0	0	0	0	0	MAT2
Fo41	0	0	0	0	0	0	0	0	1	0	0	0	0	1	0	MAT1
Fo44	0	0	0	0	0	0	0	0	0	0	0	0	0	0	0	MAT2
Fo45	0	0	0	0	0	0	0	0	0	0	0	0	0	0	0	MAT2
Fo46	0	0	0	0	0	0	0	0	1	0	0	0	0	0	0	MAT2
Fo48	0	0	0	0	0	0	0	0	1	0	0	0	0	0	0	MAT1
Fo49	0	0	0	0	0	0	0	0	1	0	0	0	0	0	0	MAT1
Fo52	0	0	0	0	0	0	0	0	0	0	0	0	0	0	0	MAT2
Fo53	0	0	0	0	0	0	0	0	0	0	0	0	0	0	0	MAT2
Fo54	0	0	0	0	0	0	0	0	0	0	0	0	0	0	0	MAT1
Fo57	0	0	0	0	0	0	0	0	0	0	0	0	0	0	0	MAT1
Fo58	0	0	0	0	0	0	0	0	0	0	0	0	0	0	0	MAT1
Fo59	0	0	0	0	0	0	0	0	0	0	0	0	0	0	0	MAT1
Fo63	0	0	0	0	0	0	0	0	0	0	0	0	0	0	0	MAT1
Fo65	0	0	0	0	0	0	0	0	0	0	0	0	0	0	0	MAT1
Fo68	0	0	0	0	0	0	0	0	1	0	0	0	0	0	0	MAT1
Fo69	0	0	0	0	0	0	0	0	0	0	0	0	0	0	0	MAT2
Fo74	0	0	0	0	0	0	0	0	0	0	0	0	0	0	0	MAT1
Fo75	0	0	0	0	0	0	0	0	0	0	0	0	0	0	0	MAT1
Fo47	0	0	0	0	0	0	0	0	0	0	0	0	0	0	0	MAT2
* MAT1-1 and MAT1-2 are abreviated to MAT1 and MAT2 respectively in this table
Effectors stand for candidate effectors
Yellow corresponds to presence of a homologue gene
Red border corresponds to a mimp near the gene
Distribution of SIX genes and MAT type among endophytic strains
