# Supplementary material for: Number of Candidate Effector Genes in Accessory Genomes Differentiates Pathogenic From Endophytic Fusarium oxysporum Strains
Source: Front Plant Sci. 2021 Nov 29;12:761740. doi: 10.3389/fpls.2021.761740 (PMC8666634; doi:10.3389/fpls.2021.761740)
Supplement: Supplementary Table 5 — Effector candidates newly identified from 45 endophyte genomes. [file Table_5.XLSX]

## Sheet: New candidate effectors 
Number	Genomic DNA sequence	Protein sequence	Signal peptide sequence	Mature protein sequence	Protein length (aa)	Signal peptide length	Mature protein len (aa)	Cysteine count (full length protein)	Cysteine count (mature protein)	Best BLASTP hit	GenBank accession of the best BLASTP hit		Go terms	Molecular function
108	TTAATTATAGATAGGTTCCCTACTAGGCCCTGCCTTTTCCTTATCTGCTGATGTCGTACTTCCATGATGGTCTTTAGCTCCAAGCTCAAGGTCTTGACTGTGTAAAGACTCCCCTCTGCCTTGTATACTTCCAGTCCCATGTGCATGGGCTTCGCAGGGACCAAGAACATAAGCATCTTCTCCATGAACTGCATCATCCCCCAAAAGCAGCTGATCCTCTGTCATTCTAAGTGGAATTCGTAGCACATGCTTAATAAACAGCATGATAAGGCTGGTCCAGACAAGGTTCCAGCCGATTATAAAGCATGCACCCGCCATTTGGTACCCAAGCTGCATACCGTTACCAGCGATGGCTCCTCCGGGATTGGTCAGACCAAAGGCTGCGCAACCATCCACAGT…	MALYAFASVLLCWVLWGYKASFGEYMLPFVAKPGNVLGIDTMLKQSYLPSIGVGQQFPMATMVYFQFVFAAITLVITAGAFLGRMNFYAWMIYVPLWLTLCYTVGAYSIWGGGFLFKLGVIDYSGGYVIHLSSGTAGFIGSYWIGPRLSSDRADARPSNILAVLIGAGILWVGWNGFNGGDPYAASADAGVAVLNTNLCTAVSLLVWTGLDIAYFKKPSVIGAVQGMITGLVAITPAAGVVAGWGAILLGVGSGSVPWFTMNILAKKMTFLERNFDDTLGVMHTHMVAGVVGGFGTGLWATVDGCAAFGLTNPGGAIAGNGMQLGYQMAGACFIIGWNLVWTSLIMLFIKHVLRIPLRMTEDQLLLGDDAVHGEDAYVLGPCEAHAHGTGSIQGRGESL…	MALYAFASVLLCWVLWGYKASFG	EYMLPFVAKPGNVLGIDTMLKQSYLPSIGVGQQFPMATMVYFQFVFAAITLVITAGAFLGRMNFYAWMIYVPLWLTLCYTVGAYSIWGGGFLFKLGVIDYSGGYVIHLSSGTAGFIGSYWIGPRLSSDRADARPSNILAVLIGAGILWVGWNGFNGGDPYAASADAGVAVLNTNLCTAVSLLVWTGLDIAYFKKPSVIGAVQGMITGLVAITPAAGVVAGWGAILLGVGSGSVPWFTMNILAKKMTFLERNFDDTLGVMHTHMVAGVVGGFGTGLWATVDGCAAFGLTNPGGAIAGNGMQLGYQMAGACFIIGWNLVWTSLIMLFIKHVLRIPLRMTEDQLLLGDDAVHGEDAYVLGPCEAHAHGTGSIQGRGESLHSQDLELGAKDHHGSTTSADKEK…	432	23	409	6	5	Ammonium transporter 3 member 1	RYC81349.1	IPR024041, IPR029020, IPR018047	GO:0072488, GO:0015696 GO:0072488, GO:0015696	GO:0008519, ammonium transmembrane transporter activity
109	ATGAATTTCTTCACTATCCTCGCGGCAACTGCGGTGGCCGTATCTGCTGGCAAGTGCTCCGACATGTCGAAACCGACGTTGGTGTGTTGCGGCACCCTCAGCAAGTTTGGCGTCTGCGTGCCTGGTAAGGCGACCGTTTTGACTACAAATGTCGCAACTTTGACGAACGCTCGCTAA	MNFFTILAATAVAVSAGKCSDMSKPTLVCCGTLSKFGVCVPGKATVLTTNVATLTNAR	MNFFTILAATAVAVSA	GKCSDMSKPTLVCCGTLSKFGVCVPGKATVLTTNVATLTNAR	58	16	42	4	4	hypothetical protein FOTG_17033	EXM14568.	-	-	-
110	TCAAGTGGATGACTTTGCTATTAGCGACAAAAAAAAAAAGGCAGCTTTAGACTGAAGGGGTGGCAAGCTGAAACAGCGGCAAGATGAAGGGCTTAATAAACAAACAACCGAACAACCAAGGAAACGAAAAAAAAATAGGGGATGGAAAGGTGTTGACAAATACCAAAAAAACAAAGGGGAGAAAAGGATGCAGGAAAGGGACATATTTGCATACAGGGGCTTTTGCTTGAATTCTTGACGACGACATGACATGGCTTTCTTACTGCAGAGCGATACGTCAATGGTTTTGATTTGCGAGCAATGATTTACACTCGGATTGGATATTATGAGCGGAAAGAGGATGGATGCTATGACAGGATAGCAAAAACACAAGCTCAAGCACAAGTGGATGACCATGAT…	MFTHIMVIHLCLSLCFCYPVIASILFPLIISNPSVNHCSQIKTIDVSLCSKKAMSCRRQEFKQKPLYANMSLSCILFSPLFFWYLSTPFHPLFFFRFLGCSVVCLLSPSSCRCFSLPPLQSKAAFFFLSLIAKSST	MFTHIMVIHLCLSLCFCYPVIA	SILFPLIISNPSVNHCSQIKTIDVSLCSKKAMSCRRQEFKQKPLYANMSLSCILFSPLFFWYLSTPFHPLFFFRFLGCSVVCLLSPSSCRCFSLPPLQSKAAFFFLSLIAKSST	136	22	114	11	8	Transcriptional enhancer factor TEF-5	TKS77647.1	-	-	-
111	ATGCAGGTCATATCTACGCTTTCCTTGATGTCTCTCATAGCAATAGCTACTGCTGTTCCTACAACCTGTCGTTCGCTCTCCGACGCGGCAGCTAAGGACATCAAGCCCATGGAGACGACATACATGATTTCATTGTGAGTGATTATCGATCAGTAGACCAATACAGCTTGCTGACTACTTCCAGCGGCGATTCCTACTCGCAAACTGGTTTCAATTTGGCTGGCGACAAACCTAGTGCCAAAAACCCTATGGGAAATCCCCCGCTGCCTGGGTGGACAGCCAGTGGTGGTTATAATTGGGTCGGCTTCGCGGCCAGTACGTTCAACGACAACACGCTTTTATCATACAACCTAGCCTACGGCGGTGCCACCACGGCCTCGGACCTCGTGAAGCCCTTTT…	MQVISTLSLMSLIAIATAVPTTCRSLSDAAAKDIKPMETTYMISFGDSYSQTGFNLAGDKPSAKNPMGNPPLPGWTASGGYNWVGFAASTFNDNTLLSYNLAYGGATTASDLVKPFSPEVKSFQDQVGEFSAQLASKPSWVPWTANDTLVAVWIGVNDVGNSFWGSGTDQLYEKIMERYFAQLKTLYDAGVRQFALLGTPPIGRTPSLVAQGQSASGRVTKAIAVYNNLLSQHLKDFKAAHSDVKTWLIDTTASFNKALDAPTQYGAPDATCYNGDGKSCLWFNDYHPGVAIQKLVAEKVATTVGMPFFKT	MQVISTLSLMSLIAIATA	VPTTCRSLSDAAAKDIKPMETTYMISFGDSYSQTGFNLAGDKPSAKNPMGNPPLPGWTASGGYNWVGFAASTFNDNTLLSYNLAYGGATTASDLVKPFSPEVKSFQDQVGEFSAQLASKPSWVPWTANDTLVAVWIGVNDVGNSFWGSGTDQLYEKIMERYFAQLKTLYDAGVRQFALLGTPPIGRTPSLVAQGQSASGRVTKAIAVYNNLLSQHLKDFKAAHSDVKTWLIDTTASFNKALDAPTQYGAPDATCYNGDGKSCLWFNDYHPGVAIQKLVAEKVATTVGMPFFKT	311	18	293	3	3	hypothetical protein FOTG_17192	EXM14401.1	IPR013830, IPR036514	-	-
112	CTACGCTATTTCCGAAAATACAAGCCACTGACCACCGGGACCTCCAGAGCCAGCTTGATGTGCAGCAAGTGCTCCTACGGTGATCTCACTCCAATCGATCCTCTGGATGGGGCTGTTGGATGAGTTGCCCAAAAGCTCTGGGAGGAAAAGAGTGACAGGATGGCTCAAGACCTCGATCCCCGCCTTAGCAATGATGGCATAGACAGTGAACAACTTGGTCACACTGCCTGTCCTGAAAATCGTGTCCTCGCTCAGCTCCCCTTTGGTAAGGGTGTCCTTGTAATCTTCGCCGACGTGATAGTAGCTGTAGAGCGAATCATTGGTTGCGGCTGAGAAGACATCAACGGCGAAAATGAGGTCTGTCTTGTTCAAGTCGCCGGCTTCAAAAAGCTCTTCAAT…	MHPLSYLACMALIAGSATASIIASDDVPLIGPSFLSNFDISKSTYLEEVKDKFPLLIEELFEAGDLNKTDLIFAVDVFSAATNDSLYSYYHVGEDYKDTLTKGELSEDTIFRTGSVTKLFTVYAIIAKAGIEVLSHPVTLFLPELLGNSSNSPIQRIDWSEITVGALAAHQAGSGGPGGQWLVFSEIA	MHPLSYLACMALIAGSATA	SIIASDDVPLIGPSFLSNFDISKSTYLEEVKDKFPLLIEELFEAGDLNKTDLIFAVDVFSAATNDSLYSYYHVGEDYKDTLTKGELSEDTIFRTGSVTKLFTVYAIIAKAGIEVLSHPVTLFLPELLGNSSNSPIQRIDWSEITVGALAAHQAGSGGPGGQWLVFSEIA	188	19	169	1	0	unnamed protein product	CEG03600.1	IPR012338, IPR001466	-	-
113	ATGAGCGCTGCCAGCTATCCAGAAGTCTGTGCCTGGGTCATCGGGCTCTTTTGGCTTATTACGTTCGTTACCTCTCAAGATTCACCGAAAGTGAAAGGTGCACCAATTGTCGGGAAAAAGTTCTGGTTGGAGCCCTCTGTCTTTCAGCGTCTCAGATTCACAACTCAATCCCGACATGTACTTCAGGATGCATACAATAAAGTAATTGAACAATCGGTCCACGTCTGTTATCAAGCTTTGTTTACTGACACTGCGGGGCAGTTCAAGGACAGAATCTTCGTTGTTCGTCGGGTTGACAGGGACATCAATGTGCTTCCTGCCAAGTATCTAGACGAGATGAGATCATTACCAAGGCCAGTGATGAATGGCACCATCCCACAAGTTCTTGTCCGTACCAAA…	MSAASYPEVCAWVIGLFWLITFVTSQDSPKVKGAPIVGKKFWLEPSVFQRLRFTTQSRHVLQDAYNKVIEQSVHVCYQALFTDTAGQFKDRIFVVRRVDRDINVLPAKYLDEMRSLPRPVMNGTIPQVLVRTKRNSPLWRCHRRLTLLIESLR	MSAASYPEVCAWVIGLFWLITFVTS	QDSPKVKGAPIVGKKFWLEPSVFQRLRFTTQSRHVLQDAYNKVIEQSVHVCYQALFTDTAGQFKDRIFVVRRVDRDINVLPAKYLDEMRSLPRPVMNGTIPQVLVRTKRNSPLWRCHRRLTLLIESLR	153	25	128	3	2	hypothetical protein FOCG_18057	EXL39325.1	-	-	-
114	ATGAGGGGGCTGTTGTTGTTGATGGTATCGGGGTTGGTGGGCAAGGGTGTTGTTTACAGCTGGGGGCGAGGCCGCGATGGCGCTGTAGGTAGTAGGCGCGGGAGCAGATTTGGCGTCAGTGAGCGCCTGATTCCAGGAGTCCAGGAAGCTATCGGCAAACTTTTGAGCGAATTCCCGTTCGGGCTCAGTAGTGAATTGTTTCGCTGCTGCTTCAAATTTAGCGCAGAAGGCCTGAAACACCTTCAACTTGGCATTGTACTCCTCCACACGGTCGCATGTGAGCTTCGTGGCTGCTTCAAAAATAGAGACTGGTTGCTGTACAGCAGTCGAGGTAGGGTCAGGGGAGGAGTCAGGATGGGCGAGCTGGGCTCCTCCCCTAGCCGCAGTAGTAGATATGTT…	MRGLLLLMVSGLVGKGVVYSWGRGRDGAVGSRRGSRFGVSERLIPGVQEAIGKLLSEFPFGLSSELFRCCFKFSAEGLKHLQLGIVLLHTVACELRGCFKNRDWLLYSSRGRVRGGVRMGELGSSPSRSSRYVMLCYVYFSSGGP	MRGLLLLMVSGLVGKGVVYS	WGRGRDGAVGSRRGSRFGVSERLIPGVQEAIGKLLSEFPFGLSSELFRCCFKFSAEGLKHLQLGIVLLHTVACELRGCFKNRDWLLYSSRGRVRGGVRMGELGSSPSRSSRYVMLCYVYFSSGGP	145	20	125	5	5	hypothetical protein FOC1_g10000015	ENH63585.1	-	-	-
115	ATGCGGTGGAGCAGGTCGAGGCACTGGGCCCTATTTATGTGGTTCCTGGTCACAAGAGGCCAGAAGAAGCAGACGGAGCATGGCACACCTCGCTTACAAAGAAGTACCTTGAGGACTGGGGCGAACTTCTCCGGAATTCACCATCAGGGCCCCAAGAGCTGTATGAGAACATGGTCAAGTTATATCCCAACAGGTTCAACCGGATGCCTCTGCTGTGGAGCGCCGGAAACGCGTTGA	MRWSRSRHWALFMWFLVTRGQKKQTEHGTPRLQRSTLRTGANFSGIHHQGPKSCMRTWSSYIPTGSTGCLCCGAPETR	MRWSRSRHWALFMWFLVTRG	QKKQTEHGTPRLQRSTLRTGANFSGIHHQGPKSCMRTWSSYIPTGSTGCLCCGAPETR	78	20	58	4	4	no hit	-	-	-	-
116	ATGAGTTCAACACTTACAAAGCCCATGTTACTGATACTTTGCTACGGAGCCCTAGCAAGGTCCACATTGCATTCGATGGCTGGACCTCTCGGAACAGGCATTCTTTCTTTTCCATCAATGCTTTCTTTCTCGACGACGAAACTTTCCAGCCTCGAAAAATCCTGCTAG	MSSTLTKPMLLILCYGALARSTLHSMAGPLGTGILSFPSMLSFSTTKLSSLEKSC	MSSTLTKPMLLILCYGALA	RSTLHSMAGPLGTGILSFPSMLSFSTTKLSSLEKSC	55	19	36	2	1	hypothetical protein DLE60_32475	PWU51072.	-	-
117	TCATACGTGGGTGTTGTCGTTCAAACCAGAAAGGTCAAGAGGGATACCAGAAGGAACAGTAACATTGTTGAGAACAATGGTAGCGCACTGATTCTTCTGAGAAACGGCCTGGGTAGCCCCGTTTGCGCCGGTGAAAGTGCAAGGACTTGGAGCTTGAGTTACGGCTGGTGCAGCTGGGACAGCAACAGCATAGCTTGCTAGCGCCACGAGAAGGATAGCTGACAACTTGGCCAT	MAKLSAILLVALASYAVAVPAAPAVTQAPSPCTFTGANGATQAVSQKNQCATIVLNNVTVPSGIPLDLSGLNDNTHV	MAKLSAILLVALASYAVA	VPAAPAVTQAPSPCTFTGANGATQAVSQKNQCATIVLNNVTVPSGIPLDLSGLNDNTHV	77	18	59	2	2	polygalacturonase	KIL93978.1	-	-	-
118	ATGAAGCTGCTTGCTGGTCTTGCTCTCGCCTCTATGGCTGTCGCTGCGCCCCTGGTGGATAAGCGCGCTCCTACTCCCTTGAACGTCGAGTTGAAGATGCAGGGGAACTCAAAGGTTAAGGCTGTTATTACCAATAATGGGAAGAGCAACTTGAAGCTCCTCAAGGTTGGAACATTCCTTGATACGGCTCCTGTTGAGAGGGCTCAGGTCTTTTCTGCCGGTAAGACTTCTCTGGATGTGAGGCATGGGTGA	MKLLAGLALASMAVAAPLVDKRAPTPLNVELKMQGNSKVKAVITNNGKSNLKLLKVGTFLDTAPVERAQVFSAGKTSLDVRHG	MKLLAGLALASMAVA	APLVDKRAPTPLNVELKMQGNSKVKAVITNNGKSNLKLLKVGTFLDTAPVERAQVFSAGKTSLDVRHG	83	15	68	0	0	Neutral protease 2	RKL45049.1	IPR001384	GO:0006508	GO:0004222 metalloendopeptidase activity
119	ATGAAGTTCTCTGTCATCACCGCCCTAACCCTTGTCAGCTTCGGTGCTGCAACACAGTACATTAGTTACGAAGGTCTCACACGGGACGGCGTTCCTTGCGATCTCAGAACTGTAGCCTGGCAGAACTGTCGCCCTAAGGCCTATGCCAATGATTGGTCTCGGGGTTGCGAGGCGGTCTTCCATTGCCGTGGTGACGACTACCCTCCTGGTCCCCCTAGTTAA	MKFSVITALTLVSFGAATQYISYEGLTRDGVPCDLRTVAWQNCRPKAYANDWSRGCEAVFHCRGDDYPPGPPS	MKFSVITALTLVSFGAA	TQYISYEGLTRDGVPCDLRTVAWQNCRPKAYANDWSRGCEAVFHCRGDDYPPGPPS	73	17	56	4	4	hypothetical protein FG05_30327	EYB27187.1	IPR008801	-	-
120	ATGCTTTGTCAAATTAAGGCCCTCGCCATTGCGGCTCTTTTCATCGACGCCACTGTCGCATTAAAGCTTGTATGCCCCTCATCGAACAGCGCTCAGCTCGCACAATGCCAAGCAGATAAAAATCAACTGAATGCCCTTTCGGCTAAGGGATGCGACTGGTGGAGTAAGTTTTCGTCCGATCTCTAA	MLCQIKALAIAALFIDATVALKLVCPSSNSAQLAQCQADKNQLNALSAKGCDWWSKFSSDL	MLCQIKALAIAALFIDATVA	LKLVCPSSNSAQLAQCQADKNQLNALSAKGCDWWSKFSSDL	61	20	41	4	3	no hit	-	-	-	-
121	ATGTTCAAGATTTTTCTCAAAACAGTTGCAGCAGCAAGCCTTATTGGCCTGGCGCCCGCCGATCCCATTCCCATTGTCCCGGATCGTGTTCGACTAGGTCCACGAGCTTCGACTTGTACCCCTCAGGCGGGCGGGTCGTCGAGCGTGGACGATGTGCCAGCCATTCAGGCCGCTATCAAAGCTTGTCCCAGTGGCACCATTGTCATACCTAGTGACCAGACGTACCATATCAACTCCCAGCTATCTTTTGCTGGCTGCAGTGGCTGTACCTTCGAGCTCAACGGAGAGCTCTTGGCGTCGACAGACTTTGGTTATTGGAACGGCAAAGGGGAAATCATTTACCTACAGAACATCAAGGGTGCTACCATCACTGGCTCCGGAACCATCAACGGCAATGGC…	MFKIFLKTVAAASLIGLAPADPIPIVPDRVRLGPRASTCTPQAGGSSSVDDVPAIQAAIKACPSGTIVIPSDQTYHINSQLSFAGCSGCTFELNGELLASTDFGYWNGKGEIIYLQNIKGATITGSGTINGNGQASCMSSKPFIYQIVFENYMTYGRVQKLTLV	MFKIFLKTVAAASLIGLAPA	DPIPIVPDRVRLGPRASTCTPQAGGSSSVDDVPAIQAAIKACPSGTIVIPSDQTYHINSQLSFAGCSGCTFELNGELLASTDFGYWNGKGEIIYLQNIKGATITGSGTINGNGQASCMSSKPFIYQIVFENYMTYGRVQKLTLV	164	20	144	5	5	putative endo-xylogalacturonan hydrolase A	RKK66123.	IPR012334, IPR011050, IPR000743	GO:0005975	GO:0004650 polygalacturonase activity
122	TTAACTCAAGGGTTCTCCATCTGACCCGATAACCTCGGGTAGATCATCAACCTTGCCCAAACGCTGCTGGGCAGAATCATCGTCTGAGTGGCTTTCATCTGATGCTGCAGGTGTAGATGCGGCCGGGCTGACACTGTCGGATGAGCGGGCAGATGCCGCCTCAGCTGCTGCTGAAGCACCTGGGCTTCCCTGGCTTCCCGGACCCCGTCCGAGGATAGTGTATCTCTCAAGAAAACATTGCTCGATGGCACTGGCGGTAACCACACTGGTGATCCACGTGGTAGTGTTTGAGATGGGTTGGATTTCCTCGGTAGTCACAATTAGGACATCGACTGTGACTTCAACGGGTTCACCGGGAAGATAGTGAGTCTCACGGCAGTGGCCTTGATGTCATTAAAG…	MFPQSLSQAAIMATLCFAGLASAVRESGDPSPAIISVSTSTTTLRADETQTGNPDDKVMVPCAGHITQCGVEDKAKIIYVPKSTRTITNKIVTTSVVVLPTSTRVIESVTVSTVTNTTKGHCRETHYLPGEPVEVTVDVLIVTTEEIQPISNTTTWITSVVTASAIEQCFLERYTILGRGPGSQGSPGASAAAEAASARSSDSVSPAASTPAASDESHSDDDSAQQRLGKVDDLPEVIGSDGEPLS	MFPQSLSQAAIMATLCFAGLASA	VRESGDPSPAIISVSTSTTTLRADETQTGNPDDKVMVPCAGHITQCGVEDKAKIIYVPKSTRTITNKIVTTSVVVLPTSTRVIESVTVSTVTNTTKGHCRETHYLPGEPVEVTVDVLIVTTEEIQPISNTTTWITSVVTASAIEQCFLERYTILGRGPGSQGSPGASAAAEAASARSSDSVSPAASTPAASDESHSDDDSAQQRLGKVDDLPEVIGSDGEPLS	246	23	223	5	4	hypothetical protein BFJ70_g4737	RKL41994.1	-	-	-
123	ATGCGCCACCTAAAAAAAAAAATAATAATAATAATAATAATAATAATCCCTCACAGGGGTTGCTGCCTTGGCAATGGCCTCAAGGCAGCAGATCCTTTCCAGGCACTGGCTCTCTTTCTTCCTTCAACATCTCACATCACAGCTCACAGCAGATCTTGCTCAAGTTCATCAGGATATTCACCGCTTCGAATTCAGAGTAGAGGAACAGATAAACGGTAG	MRHLKKKIIIIIIIIIPHRGCCLGNGLKAADPFQALALFLPSTSHITAHSRSCSSSSGYSPLRIQSRGTDKR	MRHLKKKIIIIIIIIIPHRGCC	LGNGLKAADPFQALALFLPSTSHITAHSRSCSSSSGYSPLRIQSRGTDKR	72	22	50	3	1	no hit	-	-	-	-
124	ATGCTTTTTGCCATCTTTTCGCTTTCCCTTGCTGGCCTTACTGGCCTTGCTGGTGCCTCACCACTCAGCCTTCCTTCTACTTCTCAAGACCTTCCTTCCAGACATATCCACGGTGATGAAATGCACGCTCGTGCACTTGCCCACCATCCCAAGGATCTTGTGATTGATTCCAAAGATCTACATGACTTCATGAAGAATGCCGCTGGCTCGGACGCCGTTGTGTATCTTCAAGACGAGCGCGTTTATGTACCCATGAGTAACGTCTCGTTGCTTGACACCACAGAAGACAAGAATGACGCCCACGACAGCAAGCCAAAGCGTCAGATCGCCGCTCCCTGTTATGCCTACAACCAGTGGCAAGCTAGGGATGCCAAGTCCTGGTGGAGTCCATGGGAGACA…	MLFAIFSLSLAGLTGLAGASPLSLPSTSQDLPSRHIHGDEMHARALAHHPKDLVIDSKDLHDFMKNAAGSDAVVYLQDERVYVPMSNVSLLDTTEDKNDAHDSKPKRQIAAPCYAYNQWQARDAKSWWSPWETASGCLYTGLSDGTGVYGLTWSKSVAVEVRGGLDFSAVKDLLGISVGVSVTNTWTDGGRIDCQIPAHSVGQIWVQKYLGEGNYIILQHFTMLTQIANMWSMTCQSCGISGTKCIGDWVERGYVKAPSDGYV	MLFAIFSLSLAGLTGLAGA	SPLSLPSTSQDLPSRHIHGDEMHARALAHHPKDLVIDSKDLHDFMKNAAGSDAVVYLQDERVYVPMSNVSLLDTTEDKNDAHDSKPKRQIAAPCYAYNQWQARDAKSWWSPWETASGCLYTGLSDGTGVYGLTWSKSVAVEVRGGLDFSAVKDLLGISVGVSVTNTWTDGGRIDCQIPAHSVGQIWVQKYLGEGNYIILQHFTMLTQIANMWSMTCQSCGISGTKCIGDWVERGYVKAPSDGYV	263	19	244	6	6	hypothetical protein FOCG_17756	EXL39644.1	-	-	-
125	TTAAACATGTTCCTTTTCCACCGCCACTGCTTCAAGGTCTTCTTTGCCCGCCTCAATCTGTGCCATATTGGGCACATCGCTATGCCTCTCACCCTCAAAAGCTTCGTCAATCTCTTCCATGGTCTTTCCATTAGCGTCGACCCAGAAGAAATAAACAAAAGCGATAAGAAGAACATTCCAAGCACGGCTTATCAT	MISRAWNVLLIAFVYFFWVDANGKTMEEIDEAFEGERHSDVPNMAQIEAGKEDLEAVAVEKEHV	MISRAWNVLLIAFVYFFWVDANG	KTMEEIDEAFEGERHSDVPNMAQIEAGKEDLEAVAVEKEHV	64	23	41	0	0	MFS sugar transporter-like protein	XP_018077219.1	-	-	-
126	CTAACGGAAATAGCATACGAGCCGACAGCTCTGACCGCCATTCCAATCGCTGCCGTGTACGAATTTATCCCCTTCCTTCCGACCAGCGCGGGCGCAGGCAAAGCCACAATCTTTATCTGTATAGGGGTCTTTGCCCTTCACTTTGCAATTATTCCAAATAGCGACATCGGACTTTTTGTAGTTGCAAACTACATCCCTGTATAAATCCCAGGCACCTTCAACGCCCAAGACGCCGGCTCCAAAGAGCAGAGTAAAGTGAGTGATTTTCAT	MKITHFTLLFGAGVLGVEGAWDLYRDVVCNYKKSDVAIWNNCKVKGKDPYTDKDCGFACARAGRKEGDKFVHGSDWNGGQSCRLVCYFR	MKITHFTLLFGAGVLGVEG	AWDLYRDVVCNYKKSDVAIWNNCKVKGKDPYTDKDCGFACARAGRKEGDKFVHGSDWNGGQSCRLVCYFR	89	19	70	6	6	hypothetical protein BFJ69_g7926	RKK75177	-	-	-
127	ATGACTTGGCATGCCCAACTTGCACTGGTGCTGGCCTTGGTCTGCCTAGTTTCGGCCAAGTGCACCGGCATGTCGGATGACTGCTCCTCCAACCCAATCCCGCTGCGGCAATTCAACCCCCTCAACTTTCACTCTGCTACGTGCAACCTCAAGTGGAAGCACGGCTGCACCATCAAGAACAAGCACGGCCAGCTACAGCAAAAGCCTCCTCCTTTCTTACTATGCAATGCGTGGCAGCAGCCGGCCGGACTGATACCCGTCGATGCCTATACGCTCGCGCTGCAGAAGAAGGACAGCGACTCCCCGCAAGACTCGGCTGACTTCACGCTGCACGGCCTGTGGCCTGGGTCGGCGGGCGGCACTGGCGCCAAGAACCAGCCCTACGGCTGCCTCAACGGC…	MTWHAQLALVLALVCLVSAKCTGMSDDCSSNPIPLRQFNPLNFHSATCNLKWKHGCTIKNKHGQLQQKPPPFLLCNAWQQPAGLIPVDAYTLALQKKDSDSPQDSADFTLHGLWPGSAGGTGAKNQPYGCLNGEEFDETILETFGGLLSYFWQTDPKFKNTMQCFILSEWMKHGTCAVIPGADGKAFRLSQEAYFRTAFVLANEFNANPALRKQLEEPDSEELEPLISPRCVQCAYLATVGWKDTDVPSVPRMSGDCIDQCFACGNSWDICPPVQLDSTVKLDPSNAPVERSESDSNSNGMASFPMLEFAMPAFMSSNNTSPWEGTWRSFGAEQGGSGKFEFAQTFTDKVLTVTTDSPYP	MTWHAQLALVLALVCLVSA	KCTGMSDDCSSNPIPLRQFNPLNFHSATCNLKWKHGCTIKNKHGQLQQKPPPFLLCNAWQQPAGLIPVDAYTLALQKKDSDSPQDSADFTLHGLWPGSAGGTGAKNQPYGCLNGEEFDETILETFGGLLSYFWQTDPKFKNTMQCFILSEWMKHGTCAVIPGADGKAFRLSQEAYFRTAFVLANEFNANPALRKQLEEPDSEELEPLISPRCVQCAYLATVGWKDTDVPSVPRMSGDCIDQCFACGNSWDICPPVQLDSTVKLDPSNAPVERSESDSNSNGMASFPMLEFAMPAFMSSNNTSPWEGTWRSFGAEQGGSGKFEFAQTFTDKVLTVTTDSPYP	360	19	341	15	14	hypothetical protein BFJ69_g15409	RKK66443.1	IPR001568, IPR036430, IPR018188	-	GO:0033897:Ribonuclease T2 activity, GO:0003723:NA binding
128	ATGAAGGCCGCAACATTCATCCTCACCCTCCTCGCTGCTGTTGGCGATGCGGCCTCCAAGGCTCTCTCAGTCCCCAGTACGGGAACCACGCCATTGAGGAAAGAGGCGGCCAAGAAGGATATCATCATTGGATCTGGAGCAATCAACCCGAGCTTCCTCGATGACCCTAAGTTCAGAGCTGTTCTTAGCAAGCAGTTTAACAGCCTCTCTCCCGAAAACGAGATGAAATGGGGCTTCATACACCCGAGCAAGGATAAATATAACTGGCCCTTACTCGATCGCCTCGTGGACTTCGCAGAAGATCACAATATGTTGATTAAAGGTCACACCCTGATCTCATCCTGCTGTAATCCTGATTACTTACTCAACATGACTGATCCTATCGAGTTTCGGGCTGAG…	MKAATFILTLLAAVGDAASKALSVPSTGTTPLRKEAAKKDIIIGSGAINPSFLDDPKFRAVLSKQFNSLSPENEMKWGFIHPSKDKYNWPLLDRLVDFAEDHNMLIKGHTLISSCCNPDYLLNMTDPIEFRAEMKNHIETIMHRYADKMNRWDVVTEGLETMGGGLQDNIYKKVLGASYIPDAFRFARAAAPKAKLFYNENLVESMPNKRQELLEYVTGLLADGVPIDGIGLQMHITEVPLVPGVITEIVNSYIPLGLEVAITEMDVHTLNDTLQTEIYGATIAEALAAGITDISFWGFTDKHLYTWVPGAKPLMFDEEYRPKGSFYATHSALEKFVHQH	MKAATFILTLLAAVGDAAS	KALSVPSTGTTPLRKEAAKKDIIIGSGAINPSFLDDPKFRAVLSKQFNSLSPENEMKWGFIHPSKDKYNWPLLDRLVDFAEDHNMLIKGHTLISSCCNPDYLLNMTDPIEFRAEMKNHIETIMHRYADKMNRWDVVTEGLETMGGGLQDNIYKKVLGASYIPDAFRFARAAAPKAKLFYNENLVESMPNKRQELLEYVTGLLADGVPIDGIGLQMHITEVPLVPGVITEIVNSYIPLGLEVAITEMDVHTLNDTLQTEIYGATIAEALAAGITDISFWGFTDKHLYTWVPGAKPLMFDEEYRPKGSFYATHSALEKFVHQH	340	19	321	2	2	related to endo-1,4-beta-xylanase [Fusarium oxysporum]	SCO90266.1	IPR001000, IPR017853	GO:000597	GO:0004553: Hydrolase activity, hydrolyzing O-glycosyl compounds
129	CTAGGCAGAGCATTTGCCCTTTCCAAACCAGCCACACCTGACTGAGTAAGTGATTTTATCGTTTTGCTGCGTAATAGTTCGGGTGTAGTCCTTTGTTCCATCATTAGCATTGCGACAGACAGAGCAGCGATGTACGTCATTTCCATTCTTCTGGCCGAGATCGTCGTTAGGTATGTCGCCGCCAATGTCTTCGCACATGCTTACGGCCTTCATATCCCGAAAAACATCTAAATTGCTGATACCGGACCAGTCATAGAAGATGCCACAATCTTTAGCCAAGCTAAAAGTTGGCAGGACAGCCAATAGACCAAAAGCTGCGAAACGCAT	MRFAAFGLLAVLPTFSLAKDCGIFYDWSGISNLDVFRDMKAVSMCEDIGGDIPNDDLGQKNGNDVHRCSVCRNANDGTKDYTRTITQQNDKITYSVRCGWFGKGKCSA	MRFAAFGLLAVLPTFSLA	KDCGIFYDWSGISNLDVFRDMKAVSMCEDIGGDIPNDDLGQKNGNDVHRCSVCRNANDGTKDYTRTITQQNDKITYSVRCGWFGKGKCSA	108	18	90	6	6	hypothetical protein FOZG_17668	EWZ28663.1	-	-	-
130	ATGGCCCAAGCGCTCATTCACTTTTGGGCGGCAATGGCGATGCTAGCCAGATGCTTCACAGTTTGCCAGAGCATCCATATGGCCATACTTAACGCAACGCGAGGCTCTTTCGAAGATGTCAGTGGTCTGGTAGACGACATGGACGAACTTTATCTTCTGTGTTTCCCATCGGACACTCCAGTTCCTTTGGGACCAGAAGAGCTTGCCCTGTATTACTCTGACAAGATATGCTGTTCGGCTGCCTATTGTACTTCACTTGACAAAAGGATAGTGGGACCCATTGTGCTCCTTTTTCCGCTTTGGATAGCCAAAAACACGTACGGCAAGGGCAACAGGCAGCGTCAAGTCAGAAAGAAGCGTTCTGCGCTGATATTTCCAGGGGTTTCGCCAGTCGTGGGA…	MAQALIHFWAAMAMLARCFTVCQSIHMAILNATRGSFEDVSGLVDDMDELYLLCFPSDTPVPLGPEELALYYSDKICCSAAYCTSLDKRIVGPIVLLFPLWIAKNTYGKGNRQRQVRKKRSALIFPGVSPVVGYSSQGYLRNYPPRVMFDLDGCLLQWRLFVIDESF	MAQALIHFWAAMAMLARCFTVCQS	IHMAILNATRGSFEDVSGLVDDMDELYLLCFPSDTPVPLGPEELALYYSDKICCSAAYCTSLDKRIVGPIVLLFPLWIAKNTYGKGNRQRQVRKKRSALIFPGVSPVVGYSSQGYLRNYPPRVMFDLDGCLLQWRLFVIDESF	167	24	143	7	5	hypothetical protein FOPG_16333	EXL67563.	-	-	-
131	CTACTGGCGGTATGCAGTGATGTCCAAGAACTGAGAAGTACCCTGATGGACGTTCTGCGAGATAGAGGTCGTAGCACCTGCGGGAACTTGGTCCGTGATATCGCCCAAAGCCCACTCGACGTAGACATTGATACCCCCTCGAGTCAAGTTGTCGATGATGACCTTGAGGTTGTTGGCAGCGATCCTGATAATCGTGATCTTCGCGATTTCAAGTGCAACCGTAACTCGCTCACCCACGCCAGGCCAGTTCACTTGGGCTCGAGGCACCAAGACAGCGCCATCGTCCGAACGCTCAGCTTGTTTGGAGGATTCCTTGCCAGGTTCATAGCTGTACTCGAAACGAACATGGTTCTGCTCCTGATGAGCTACCGCGAGTGAGAAGTCATGCACGCCCTCGCT…	MKVLALAASLLWVLPALATPVTNTTSPANPPGSEGVHDFSLAVAHQEQNHVRFEYSYEPGKESSKQAERSDDGAVLVPRAQVNWPGVGERVTVALEIAKITIIRIAANNLKVIIDNLTRGGINVYVEWALGDITDQVPAGATTSISQNVHQGTSQFLDITAYRQ	MKVLALAASLLWVLPALA	TPVTNTTSPANPPGSEGVHDFSLAVAHQEQNHVRFEYSYEPGKESSKQAERSDDGAVLVPRAQVNWPGVGERVTVALEIAKITIIRIAANNLKVIIDNLTRGGINVYVEWALGDITDQVPAGATTSISQNVHQGTSQFLDITAYRQ	164	18	146	0	0	hypothetical protein FAVG1_13150	KIL83642.1	-	-	-
132	ATGGCTTTTCATCATGTACTGACTCTGTTGAGTCTCTGGCTAGGTTTGGCGGCGGCCATTCCAAGCTCTCATATTTACGAACGAGCTGTTTCTTCTGAACCTCTTCCTCCCAGTCAAGATCCATGGTATACTGCTCCTGAGGGCTATGAGAAGAAAGAACCTGGCACTGTTCTCCGACTTCGTCCTGCACCTGGAAACTTGACCCGTATGACTGGCAACAGCTCTGCGATATATAATATCCTGTACCGCACGACAGATAGTCATTATAAGCCTACCTGGGCTGTTACGACGCTTTTGGTTCCAAAGCTTGGTCCGAACAGCACTGCTGCTTTTCTATTCAACCAAAGTGCTGTGCTCTCAATCCAGGTTCCCTACGATTCAGCAGATGTCGATGCTAGT…	MAFHHVLTLLSLWLGLAAAIPSSHIYERAVSSEPLPPSQDPWYTAPEGYEKKEPGTVLRLRPAPGNLTRMTGNSSAIYNILYRTTDSHYKPTWAVTTLLVPKLGPNSTAAFLFNQSAVLSIQVPYDSADVDASPSYAVYAPDSGAKLFREVFNDALGLGVFINVPDYEGPLASFTAGVISGHATLDSIRAVLSLGHGLNSVDPRVALWGYSGGALASEWASELAVQYAPDLQGKVLGAAIGGLTPNVTAVLDAISGKDSAGLAPSSILGLTSQYPDVRKYVVSQLKTHGKNNKTAFLAAVNYALAEAGAAFADVDIFDFFKTGEKLFRDPRLLHVINRDGIMGYHGVPQWPIFAYQGIKDEISPIQNTDKLIERYCAVGANILYQRNTVGTHADNFLLN…	MAFHHVLTLLSLWLGLAAA	IPSSHIYERAVSSEPLPPSQDPWYTAPEGYEKKEPGTVLRLRPAPGNLTRMTGNSSAIYNILYRTTDSHYKPTWAVTTLLVPKLGPNSTAAFLFNQSAVLSIQVPYDSADVDASPSYAVYAPDSGAKLFREVFNDALGLGVFINVPDYEGPLASFTAGVISGHATLDSIRAVLSLGHGLNSVDPRVALWGYSGGALASEWASELAVQYAPDLQGKVLGAAIGGLTPNVTAVLDAISGKDSAGLAPSSILGLTSQYPDVRKYVVSQLKTHGKNNKTAFLAAVNYALAEAGAAFADVDIFDFFKTGEKLFRDPRLLHVINRDGIMGYHGVPQWPIFAYQGIKDEISPIQNTDKLIERYCAVGANILYQRNTVGTHADNFLLNAPDAIDWLTTVLLGAYAQT…	450	19	431	2	2	Trichothecene C-3 esterase	TVY60170.1	IPR005152, IPR029058	GO:0016042	GO:0004806: Triglyceride lipase activity
133	TTAGTGGTGGTGGCCAAACTGTGTAAGAAGTGGCACCAGCATACCACCCATGGTGGCCAATGTATCGCGCATCTGCGGTCCCTTTAGTTTCCGCTGGGCTGCGGCACTACTGTCTGCATAGCCGTTGATGCCGTGGTCATGAGTATGGGGGGTAGTATCCTCTTGCATCGCATGCATAGCAACATATCTATCGAGATGTCAGTGACGAATGTCAAGAAAGACATGCTTAACTTACAAAAACGTGCCACCAGAGAAGAGGAGTAGCATGCCGGTCCACCAGTGATCACTCTCAACCTTACCACCACCTAACAGAGTGATCAATGTCCATGTTGTCAACGCACCAAAGGGTGCGGCCAAACTGAATACAATAAGATGTCCTCGAGCAGCTCGCTTCGATAG…	MGGVLLLLGLCLIMALASFLAGALPLSMSLSQSQLRLLSSVGVGILVGTSLIVIIPEGIEAATAPAEAAHMHRVRSLVRRTPWSHAVLTRGLPESIVTISTGSIEKRNDELDTEALVRRIINAAAGNGRVKRADIETAVEATGDDTPATPGAGDTTKDSTTDNKGSETAESGKDGQQSHDGDHEAEHDHDHEHEKEEAHEHEHEHAVPTFEIGFSLTLGFLLMFLIDRLPRHATESLHSAPQTRHISLDNLNGDSASVDEEADGFLGSLTPTPRRARSLATTTGLVIHAAADGIAMGASSTTSDMKLGFIIFAAIMIHKAPAAFGLTSLLLKQGLSKRAARGHLIVFSLAAPFGALTTWTLITLLGGGKVESDHWWTGMLLLFSGGTFLYVAMHAMQED…	MGGVLLLLGLCLIMALA	SFLAGALPLSMSLSQSQLRLLSSVGVGILVGTSLIVIIPEGIEAATAPAEAAHMHRVRSLVRRTPWSHAVLTRGLPESIVTISTGSIEKRNDELDTEALVRRIINAAAGNGRVKRADIETAVEATGDDTPATPGAGDTTKDSTTDNKGSETAESGKDGQQSHDGDHEAEHDHDHEHEKEEAHEHEHEHAVPTFEIGFSLTLGFLLMFLIDRLPRHATESLHSAPQTRHISLDNLNGDSASVDEEADGFLGSLTPTPRRARSLATTTGLVIHAAADGIAMGASSTTSDMKLGFIIFAAIMIHKAPAAFGLTSLLLKQGLSKRAARGHLIVFSLAAPFGALTTWTLITLLGGGKVESDHWWTGMLLLFSGGTFLYVAMHAMQEDTTPHTHDHGINGYADSS…	450	17	433	1	0	hypothetical protein FOXB_12760	EGU76739.1	IPR003689	GO:0030001, GO:0055085	GO:0046873: Metal ion transmembrane transporter activity
134	ATGATCGTAGCGTTCTTCTTGGTGTATCCCATTATTCTTCTCATGGAATCATCAACAGTGCTCTGCGATCTTATCAATCGTCCGGTAGCAAAGCATACAGTTCAGAGATGGGAGTCAGCCCTACGAGCCTTTGTCTTCACGCCCCTCGTCGTCGCTGGGCTGGTGGCTGGAATAATTGGAATGGGCTCATCAGATCATTTCAGAACTGAACATGGAGTAAGTTGTCTCATGGGATGA	MIVAFFLVYPIILLMESSTVLCDLINRPVAKHTVQRWESALRAFVFTPLVVAGLVAGIIGMGSSDHFRTEHGVSCLMG	MIVAFFLVYPIILLMESSTVLC	DLINRPVAKHTVQRWESALRAFVFTPLVVAGLVAGIIGMGSSDHFRTEHGVSCLMG	78	22	56	2	1	hypothetical protein FVEG_12599	XP_018760559	-	-	-
135	TCAACGCGGTCTAACAGACATTGTCGTCAGATAAGTGTGAGGATTCCCGCTGTTTAGTTTTCTGTAACTGAAGGGGTTATTGCCGTTGGAAAGATACTGTTGGACTCTAGGAACCGGATCCGAGAACGTTGAGATGAGATAGCCAATGAACTTCTGCTGACGAGGTACTACCACGTTGGCACAGGCAGTGAGTGCCAAAGCCGCTGTTGCCAGAAATTTAAACAAGTTCCAATGCAT	MHWNLFKFLATAALALTACANVVVPRQQKFIGYLISTFSDPVPRVQQYLSNGNNPFSYRKLNSGNPHTYLTTMSVRPR	MHWNLFKFLATAALALTACA	NVVVPRQQKFIGYLISTFSDPVPRVQQYLSNGNNPFSYRKLNSGNPHTYLTTMSVRPR	78	20	58	1	0	hypothetical protein FOCG_17303	EXL40118.1	-	-	-
136	ATGAAGCTGCTATCTGCCATTCTGTTTGCCACGATGGCTGCAGCTACACCTGTCCTCGAAAAGCACCCTCGAGGGCCTGCCGAACTGAGCCGTTTGGATGTTCGTAATACGGATTGTGCTTACGCCGTTTGCGACGGAGGCTGTGGTCAGTGTAGTAGTGATGGTCACAATGTGTGCTGTCCTCACAATCCCGACATTTCTTGTTTTAAATTTGCATGTTAA	MKLLSAILFATMAAATPVLEKHPRGPAELSRLDVRNTDCAYAVCDGGCGQCSSDGHNVCCPHNPDISCFKFAC	MKLLSAILFATMAAA	TPVLEKHPRGPAELSRLDVRNTDCAYAVCDGGCGQCSSDGHNVCCPHNPDISCFKFAC	73	15	58	8	8	hypothetical protein FVEG_09380	XP_018756239.1	-	-	-
137	TTACTGACCTTGATATCCGTAGAAACCGCACCCATAGAAACTCTGCTGGTTTCCATTGCTCGTAAAAGCAATGGCCTGACTTCCTACTCCAAACGAATTGACAACGTCGATGTTATACATTCTGAAGTTGTTGCCTCTTGCATCCACTGTGGAGCTAGCCTCATCGCTGCCTGCGACTGTGGCATTTTCCGAGTGATGAATGGTCACTTTGTTGTTGGCATAGGAAGAGGTGTCCGTGGTGTAGCCGTAAAGCGTCAAGGTACCCTTGAAGGCGTTGATAACGACTTGCTCTTGGTAGATGCCGGGGTACATGAAGATGCATGCTGTCGAAGAAGAGCTGCCAGTTCCTAAGGCGCTGACAGCAGCGCCGAGCGAGCTGTACTCGCCCGAAGACGCACC…	MASQVLALIVSFAALGVSCSSRTSTPSGCLAVKASGASSGEYSSLGAAVSALGTGSSSSTACIFMYPGIYQEQVVINAFKGTLTLYGYTTDTSSYANNKVTIHHSENATVAGSDEASSTVDARGNNFRMYNIDVVNSFGVGSQAIAFTSNGNQQSFYGCGFYGYQGQ	MASQVLALIVSFAALGVSCS	SRTSTPSGCLAVKASGASSGEYSSLGAAVSALGTGSSSSTACIFMYPGIYQEQVVINAFKGTLTLYGYTTDTSSYANNKVTIHHSENATVAGSDEASSTVDARGNNFRMYNIDVVNSFGVGSQAIAFTSNGNQQSFYGCGFYGYQGQ	167	20	147	4	3	hypothetical protein BFJ69_g15681	RKK66117.1	IPR012334, IPR011050, IPR000070	GO:0042545	GO:0030599 pectinesterase activity
138	TTACGTGTTGAAGTCTAAAATGCAATTAGCAACATTCGTTGTGCTTACGGCGTGCCGACACATGGATTTACATACTAATAACCTCGAAGCCTTTCCCGTATTCAGCAGGGCATGGATCCTCTCCCCACCAACCAGCACCAAGACACTAGATGCATTAATAGACAGGCACATAATGAATTACGTTGTTGAGCGCCATTGACTTACGTAATAGCCTGAACGGCTCCTGTATTCCGCTGGAGCGTCTGTACGAGGCCCCCAGGTGCCCCCCTTCTTCTTACAGAGGGACTGGCCTAGATCCTGTGATGCACCCTTACAATAGCTCAGCCATTTTGAACCGGTCTGCGCAGTGGCAGTAGCGCTACAATAGTGCTTTAGATAATGCTAACAGACGTGTAGAAG…	MKITSIAILAFLSATATAQTGSKWLSYCKGASQDLGQSLCKKKGGTWGPRTDAPAEYRSRSGYYCLGAGWWGEDPCPAEYGKGFEVINFNT	MKITSIAILAFLSATATA	QTGSKWLSYCKGASQDLGQSLCKKKGGTWGPRTDAPAEYRSRSGYYCLGAGWWGEDPCPAEYGKGFEVINFNT	91	18	73	4	4	hypothetical protein FOVG_16648	EXA32072.1	-	-	-
139	ATGTTCTACAAACCTTTTGCCTTGGTAGGGCTCCTCCTCCCGAGCCTAGGCCTCGCAGATACCTTCGACGCATGCTCGACTTCCGAGATCACCACGTGCAACTGCCCAACCACTCCGGTGAAGAGATTCCAGTCCCGAGACTTCACCTTCCCCGAGCATCTCTTCCCTCGCACGGCTAATTCCTGCTCCGGTGATACACCTCCTTGCTGCGTGGAGAAGGGCCCTGGACCAGTGCAAGTCTCACCTTCTACCAGCAAAACGAACCTTCAATGCGGCTCCAAGTTTGGTGACGATCAGCTGGATGTCACAGACGGCGTCGCTTACACGATCGAGGACTGTCCTGCATCGGGGCCATACTCTGGGAAGAAGTGTCTGCACATTGCGATCACCACTGCTGCC…	MFYKPFALVGLLLPSLGLADTFDACSTSEITTCNCPTTPVKRFQSRDFTFPEHLFPRTANSCSGDTPPCCVEKGPGPVQVSPSTSKTNLQCGSKFGDDQLDVTDGVAYTIEDCPASGPYSGKKCLHIAITTAAAATISDIHLQVDDDPITLNTKLGKWPFNSYCTLSPTECWVPFDAIIATFENPSVSSLCDTTVYVAVGISVSSKRCASGATCFNQGTAIGSGNWFMYFTLDLECPEICLRKCCCPALPPPPPDTKSCSIGTAFGYGDGFKKLNGDPVGPALGGSGCNRWGWYFTPSKATLTAGISGSLIVGAGQNDISKGTKAGTWSASLSGSQINVQYNLYDDDTNGHFDLAEVHVYASCSAPTKCAPGDYTYVFPSGTLTGSSDTTYSTSIQVDG…	MFYKPFALVGLLLPSLGLA	DTFDACSTSEITTCNCPTTPVKRFQSRDFTFPEHLFPRTANSCSGDTPPCCVEKGPGPVQVSPSTSKTNLQCGSKFGDDQLDVTDGVAYTIEDCPASGPYSGKKCLHIAITTAAAATISDIHLQVDDDPITLNTKLGKWPFNSYCTLSPTECWVPFDAIIATFENPSVSSLCDTTVYVAVGISVSSKRCASGATCFNQGTAIGSGNWFMYFTLDLECPEICLRKCCCPALPPPPPDTKSCSIGTAFGYGDGFKKLNGDPVGPALGGSGCNRWGWYFTPSKATLTAGISGSLIVGAGQNDISKGTKAGTWSASLSGSQINVQYNLYDDDTNGHFDLAEVHVYASCSAPTKCAPGDYTYVFPSGTLTGSSDTTYSTSIQVDGTCSSYYLILHAKVNEVFPK…	427	19	408	25	25	hypothetical protein BFJ63_vAg18056	RYC79066.1	-	-	-
140	TCAATTCACAGTGCATTGTCCCATCTCGTATCCGACACAAGTAAACTTAATATGCTGGCCGTCAATCGTTCCGGTGCTGGTTTTGGAAGCCCAGTTGTAAGGATGGTTATAGGTAAATGCCCAGTATCTAGCGCAGTTCCTTGGGCCAGCGCAGCATATTTTATTGCCGCCATCCCAAAATCCAAAGCGTAGGTCCGGGTCGGCCTTCGCGCGTGCGGCCGCGTTAAGGAGAAGTTTCGGGAGAAGGCCATCCTGGCTGGAATCAACAGCATAGCAACCGACTTGAATATTTTTGTTCTGGGCTTCGGCGATAGGGAAGATGGCAAAAGTCATTGCCGCAACTGCTGAGAGCTTCAT	MKLSAVAAMTFAIFPIAEAQNKNIQVGCYAVDSSQDGLLPKLLLNAAARAKADPDLRFGFWDGGNKICCAGPRNCARYWAFTYNHPYNWASKTSTGTIDGQHIKFTCVGYEMGQCTVN	MKLSAVAAMTFAIFPIAEA	QNKNIQVGCYAVDSSQDGLLPKLLLNAAARAKADPDLRFGFWDGGNKICCAGPRNCARYWAFTYNHPYNWASKTSTGTIDGQHIKFTCVGYEMGQCTVN	118	19	99	6	6	hypothetical protein BFJ65_g14764	RKK10767.1	-	-	-
141	ATGAAGATGTTTTCCATCCTCGCGCTTTGCCTTGTCCTCAAATTCGTTATGACTGACTTGCTGCCGAACAGGGTGTTTATTACGGGAGTTGAAGCCGGAGTGAGCAAGTGTTTTCGCTGTCAGCGACTTGGAATGCTAGGGTTTTCATTCGTGCAGGTATCATCAACACTGTTGCTCGCCGAGCGCAGATGGGGGCCACACCGTGGGGTCTGGTCTCGGGTCCCGGATGTCTTGGTTTGGGATCTTGAAAGAATGTAG	MKMFSILALCLVLKFVMTDLLPNRVFITGVEAGVSKCFRCQRLGMLGFSFVQVSSTLLLAERRWGPHRGVWSRVPDVLVWDLERM	MKMFSILALCLVLKFVMT	DLLPNRVFITGVEAGVSKCFRCQRLGMLGFSFVQVSSTLLLAERRWGPHRGVWSRVPDVLVWDLERM	85	18	67	3	2	uncharacterized protein LOC116002923 [Ipomoea triloba]	XP_031098973.1	-	-	-
142	TCAAACGAGAAACGGCTGCCTTTGAACCTGATTGATATGATCTTTTGCAAGATTTCCTGTCCGATCGTCACGAGCTCTTTGCTTTGATGGAATCCATAGTGTCTTAGTCGAGCCTGCGGGTGCTGGATGTTCGACTGAGCAGTAGGAACCTGAAGTTTGTCGTGTGGATGGGGTGTTTTCCTCTTCATCGTGTAGCCTAGCACCATATAGTGTGTGCAGTCTAGTGTTCAACGCGAGACTTCGAGCATGGAAAAGGACGAGGTCCATCTGGCTTACGATGGTGCACAGACTGCCAGCGAAACCGTAGTAAGCAACATCCAATTTCCTTGTCATGCCTGCCACTAGCCCTCCCCTGTTGCATATCTTCATCACGATCGGCTTACGGATGCTGACCTTCCA…	MSARFLTVIFYYFSFALKCTVNCLTKWKVSIRKPIVMKICNRGGLVAGMTRKLDVAYYGFAGSLCTIVSQMDLVLFHARSLALNTRLHTLYGARLHDEEENTPSTRQTSGSYCSVEHPAPAGSTKTLWIPSKQRARDDRTGNLAKDHINQVQRQPFLV	MSARFLTVIFYYFSFA	LKCTVNCLTKWKVSIRKPIVMKICNRGGLVAGMTRKLDVAYYGFAGSLCTIVSQMDLVLFHARSLALNTRLHTLYGARLHDEEENTPSTRQTSGSYCSVEHPAPAGSTKTLWIPSKQRARDDRTGNLAKDHINQVQRQPFLV	158	16	142	5	5	PREDICTED: receptor-like protein 12	XP_019101333.	-	-	-
143	ATGAACCGCTTCACACGCATCGCGCTAGCCGTGATTGCTGTGCTCTTTGTCTTCGCTATATTGGTGTCTTACCAGGCGCCCGAGAGCTTTAAGGATCATTTACCAAGCGCAGACTGGCATTGGCCTTCGAAAGGCGACAATGTCACTATCGACGAGCCCCCAAAGCCTACCGACGCCGCTGGCGCCGTGGGTGCTGGAGAGGAGGACACAGAGTTGGACAAGGACCCCAACACAGACATCTCCTACGATTTGACTCGAGCTCCTACACCGGGTTGTGAGAACATCGTCAACGATTTACAGCAGCGTCTCATCCATGCCTACCAGAAGAGGTTCGAAGGAATTCGCTATGCCAACATCTGGGGTTATCTCGAGACGGAGAACAAGGGTGATGCTGCGATT…	MNRFTRIALAVIAVLFVFAILVSYQAPESFKDHLPSADWHWPSKGDNVTIDEPPKPTDAAGAVGAGEEDTELDKDPNTDISYDLTRAPTPGCENIVNDLQQRLIHAYQKRFEGIRYANIWGYLETENKGDAAIWSAQQILLSILGIETMEACR	MNRFTRIALAVIAVLFVFA	ILVSYQAPESFKDHLPSADWHWPSKGDNVTIDEPPKPTDAAGAVGAGEEDTELDKDPNTDISYDLTRAPTPGCENIVNDLQQRLIHAYQKRFEGIRYANIWGYLETENKGDAAIWSAQQILLSILGIETMEACR	153	19	134	2	2	uncharacterized protein FFUJ_07711	XP_023430966.1	-	-	-
144	TCATACCCTTCCTGACCACACCTGCTCAAGCCTTCTGAATTCTGAAGGCACAGATGCTTCACATTCTTCTCCTGGCTGAAGCACAAACGATACATCCGTGGCTCTGTTTTGCCCATCAATAATGCTGAATGCGTAGCCGCGCGGCTGGGAATCGTAGTTTTGAATCAAGGCTTTGCCGTATTGCCCAGCTTTGCCCATGGCGATAATGACACGTCCGGCGGTCCCGCAGCCACCGAGTTGAGTGTCCTTATTGACCTGAGTGATCGGGCAGATGTCATCACGACCAAAAATTGCCTCATGGCATTGGCTGCGGGCCATTGCAGTGCTGCTACAAAGGAGAATCGAAAGAGAGAGAAATTTCAT	MKFLSLSILLCSSTAMARSQCHEAIFGRDDICPITQVNKDTQLGGCGTAGRVIIAMGKAGQYGKALIQNYDSQPRGYAFSIIDGQNRATDVSFVLQPGEECEASVPSEFRRLEQVWSGRV	MKFLSLSILLCSSTAMARS	QCHEAIFGRDDICPITQVNKDTQLGGCGTAGRVIIAMGKAGQYGKALIQNYDSQPRGYAFSIIDGQNRATDVSFVLQPGEECEASVPSEFRRLEQVWSGRV	120	19	101	5	4	diaminopimelate decarboxylase [Halopiger aswanensis]	WP_120244951.	-	-	-
145	ATGAAGTTCCTCACCACCGCTCTTCTCTCTGCCGCCGCCGTCTCTGGCTACTCCGTCTACGAGGTCAAGGACTTCACCGCCAGCTGCGTCCCTCACAGCACCTTCTGCAAGTCAGTACTATCCCTTCTACTCTTCATAAGAACAAGTCCTAATTTAGCTTCTCTAGCTATGAGTTCAAGGTGATCCAGTCCGGATCCATGGAGACCTGGAAGACCCCCGTTCACTGCTCCGCCCACGTCCAGTCCGCCAACTATCTCCTCCCTGATGTCAAGGACGCTAAGTGCAAGGATTCTTCTCGCACCTTCTCCGTCAAGCGCAGCAAGAAGGGCTTGAACTTCTCTGTCTCCCAGCCTGTCAGCCCAATCAGCAACACGGTTGGAAAGCATTTTATTCCCAACA…	MKFLTTALLSAAAVSGYSVYEVKDFTASCVPHSTFCNYEFKVIQSGSMETWKTPVHCSAHVQSANYLLPDVKDAKCKDSSRTFSVKRSKKGLNFSVSQPVSPISNTVGKHFIPNKQLWQSKEPNAEIQAYKGPKDFKLNAVE	MKFLTTALLSAAAVSG	YSVYEVKDFTASCVPHSTFCNYEFKVIQSGSMETWKTPVHCSAHVQSANYLLPDVKDAKCKDSSRTFSVKRSKKGLNFSVSQPVSPISNTVGKHFIPNKQLWQSKEPNAEIQAYKGPKDFKLNAVE	142	16	126	4	4	hypothetical protein FOXG_04016	XP_018238493.1
146	ATGCGTGCTACTCTTGCTCTTGCGACCCTCATCGGGTTGTCAAACGCCGCTGCTATTGACCCCCGCAAGGCTGAGCCTCTCTACAAGATTGAGCTTGCGCCTGGCGATGTCCGCACCGTCACTGAGAAGGAAAAGTGGGCACTGAGAGCTGTACGTTTCATGTCCTCGCACAATTTCTCGCCGAGTCTGACCGTCACAGGAACACAAAACCTTCATCGATGTCACCGACCTTGATGAGCCCGGCTTCAGCCTTCAGTTCCTCGCCAGCTTCCCTGGCGCTGTTGCTCAGACATCTGCCGTCAACGCTCTCATTCCTAAGCTGAGCCAGACAAACCTACGCAGCACTCTAACAGAGTTCATCAAATTCCAGAATAGATACTACAAGTCCACCTACGGCCA…	MRATLALATLIGLSNAAAIDPRKAEPLYKIELAPGDVRTVTEKEKWALRAEHKTFIDVTDLDEPGFSLQFLASFPGAVAQTSAVNALIPKLSQTNLRSTLTEFIKFQNRYYKSTYGQQSAEWLFGQIQSIITASGANNVKVEKFTHSFRQPSIIATITGKSAATIVVGAHQDSVNLRSPDTGRAPGADDDGSGTVTILEAFRVLLTDSRVSTGQAPNTIEFHWYAGEEGGLLGSGAIFQKYKQDGRQVKAMLNQDMTGYVKPGTTEVVGILTDNVDAGLTAFLKKVVAAYSKLPTVDSKCGYGCSDHASATRQGFPSAMAFESTFDNSSPYIHGTTDTIDTVNFGHVLEFSKICLGFAYELGFATTL	MRATLALATLIGLSNA	AAIDPRKAEPLYKIELAPGDVRTVTEKEKWALRAEHKTFIDVTDLDEPGFSLQFLASFPGAVAQTSAVNALIPKLSQTNLRSTLTEFIKFQNRYYKSTYGQQSAEWLFGQIQSIITASGANNVKVEKFTHSFRQPSIIATITGKSAATIVVGAHQDSVNLRSPDTGRAPGADDDGSGTVTILEAFRVLLTDSRVSTGQAPNTIEFHWYAGEEGGLLGSGAIFQKYKQDGRQVKAMLNQDMTGYVKPGTTEVVGILTDNVDAGLTAFLKKVVAAYSKLPTVDSKCGYGCSDHASATRQGFPSAMAFESTFDNSSPYIHGTTDTIDTVNFGHVLEFSKICLGFAYELGFATTL	367	16	351	3	3	leucyl aminopeptidase	XP_031053610.1
147	CTACCAACCGCCACAGTATCGACCTGTTTTCGGATCCTTGGCACATGTCTGATTCCAGCCGCTCGACATGCTATTACCAATGTATAGCCAATAGTTTGTTGGGTAAGTGTCGGACATGAAATCTTCCTCAGCACATTCCTTGACGAGCTTAGGATACCAGTTGCGAAGCGAGTCGGAGCACCTGTCGCTGCAGATCGTGTCGGCCATCTCTAGATCTTTAGATGATTGGCCTCGAAATTCCGGGACGGTGAATTCGAAAATGTATTTGTCGCAATCGATTTCAGTTCTCAATACCTTCTCACAAGCGCTCCCAACCCAGACATCTTCAGGATTAAAGTCTCCGGGTTCGAACAGTTTTATTGCACTGGCGCTCACGCAGAGACCAAGCGTGACAACAAA…	MAMSRFVVTLGLCVSASAIKLFEPGDFNPEDVWVGSACEKVLRTEIDCDKYIFEFTVPEFRGQSSKDLEMADTICSDRCSDSLRNWYPKLVKECAEEDFMSDTYPTNYWLYIGNSMSSGWNQTCAKDPKTGRYCGGW	MAMSRFVVTLGLCVSASA	IKLFEPGDFNPEDVWVGSACEKVLRTEIDCDKYIFEFTVPEFRGQSSKDLEMADTICSDRCSDSLRNWYPKLVKECAEEDFMSDTYPTNYWLYIGNSMSSGWNQTCAKDPKTGRYCGGW	137	18	119	8	7	uncharacterized protein FRV6_00615	SCO76403.1	-	-	-
148	TTAGAGGCTAAACATGCCCACATCACAGGGCTGAAGCAGGTGTGTGAGGTGTGGAGGGAAGGGAAAAAGCTCGATGTTGTGTTGAGCGGCGTAGTGGAAAATTTGGGCTGTGAACGGGTTGGCCACCCATACTAATGATTGGCTGAATAACAAACAATAAAATATCACTTTCAT	MKVIFYCLLFSQSLVWVANPFTAQIFHYAAQHNIELFPFPPHLTHLLQPCDVGMFSL	MKVIFYCLLFSQSLVWVANP	FTAQIFHYAAQHNIELFPFPPHLTHLLQPCDVGMFSL	57	20	37	2	1	hypothetical protein HIM_10272	KJZ70343.1	-	-	-
149	ATGCGTTTCTCTGTCCTCGCTACCTGCGCCGGCCTGCTGCAGCTTGCCGCTGCCGCTGTCCCTGTCGGCGTCGCCATCACCAAGTGCACTGTCGACAGGAACATCGCCCTCACTTTCGACGATGGTCCTTTCGCCTACACCAACGAGCTTCTCGACCAGCTCAAGAAATACGGCTACAAGGCTACCTTCTTCATGAACGGCGAGAACTGGGCCAACATCAACGACTACGCTGCTACCGTCAAGCGTGTCGTCGCTGAGGGTCACCAGCTCGGCTCTCACACGTATGTTTCATCATTGATATATGCTGTGTGACAGTTCGTATATGCTAACACTCACACAGTTACAGCCATCCCGACCTTGCTACCATTAGCAACGCCAATGTCCGAACCCAGATGACTC…	MRFSVLATCAGLLQLAAAAVPVGVAITKCTVDRNIALTFDDGPFAYTNELLDQLKKYGYKATFFMNGENWANINDYAATVKRVVAEGHQLGSHTYSHPDLATISNANVRTQMTRLEAEFLKIVGKWPTYMRPPYFSYNANTLSVMKTLGYHVINADVDSLDWEYNTPAETNTALNLFKKGITNGGSIALFHDVHENTVRNLIPKVLDAVKRSTRIPVTVGQCLGDPAANWYKTTKRTKRDFEDDEEVEDEKTVDERSLSEYIERSRFRRHAHHA	MRFSVLATCAGLLQLAAA	AVPVGVAITKCTVDRNIALTFDDGPFAYTNELLDQLKKYGYKATFFMNGENWANINDYAATVKRVVAEGHQLGSHTYSHPDLATISNANVRTQMTRLEAEFLKIVGKWPTYMRPPYFSYNANTLSVMKTLGYHVINADVDSLDWEYNTPAETNTALNLFKKGITNGGSIALFHDVHENTVRNLIPKVLDAVKRSTRIPVTVGQCLGDPAANWYKTTKRTKRDFEDDEEVEDEKTVDERSLSEYIERSRFRRHAHHA	274	18	256	3	2	hypothetical protein FOXG_09221	XP_018246303.1	IPR002509, IPR011330	GO:0005975	GO:0003824:Catalytic activity, GO:0016810: Hydrolase activity, acting on carbon-nitrogen (but not peptide) bonds
150	ATGCATTTTGCTACCATCATCGCTACTGCTGCTCTCGTCATGGGCGTCGCTGCTGAGCCTGCTTCCAAGGATCTCCCCTTCAACGTCATTTCTGCCCGCATTTGGAGCTCTAAAGACTGCGGAGGTGACAACAACAACGGAAACCTCGGTGAATTGACCACGCATCGTGATGAGCTCAATGAATGCTTCAAGTTCACCGACAAGGTCAAATCTGTGAGCCAGTATGAGCATGCTAAGGGCTGCAAGCGTAATAACTCCCTTGTCGCTACAAGTGCAAGATTGCTGACATGTTTATAGTTCTTCTTTTCACAGACAGCAACTGCAAGCGTGGACAGAAGACTGTCAAGGACGACCAGTGTCGCGAGACTTCTTCTCACTTCAGCAGCTACAAGACTGTTT…	MHFATIIATAALVMGVAAEPASKDLPFNVISARIWSSKDCGGDNNNGNLGELTTHRDELNECFKFTDKVKSVSHALGEVASEAIEDVGDGLDDGSKRGARKGVEDVGEDVDETGNDVADELGDEAEEGGNGLEEELESAADNVVETKDAQDLLGDTDELVEKLDDEAENDLDVGNVDLDADDILELVDNGGEEHIEGVDFGSDDLDGGSLGDGVGLDLGDDLLCRYC	MHFATIIATAALVMGVAA	EPASKDLPFNVISARIWSSKDCGGDNNNGNLGELTTHRDELNECFKFTDKVKSVSHALGEVASEAIEDVGDGLDDGSKRGARKGVEDVGEDVDETGNDVADELGDEAEEGGNGLEEELESAADNVVETKDAQDLLGDTDELVEKLDDEAENDLDVGNVDLDADDILELVDNGGEEHIEGVDFGSDDLDGGSLGDGVGLDLGDDLLCRYC	227	18	209	4	4	hypothetical protein FOXG_09565	XP_018246905.1	-	-	-
151	ATGCGGTTTAATCACTTCTGCCTACTTTACATTTCTTTGTCCCCACTCGTTTCGGCGGAACTTCAACATGTTGATGTTGCGATTGTTGGAGGTGGACTCTCTGATCTAGCGGCGGCCAAAGACCCTGCAGCTGCAAAGAAGTCTTTCGTCGTACTTGAAGCTAGAGATCGTGTTGGAGGTAGAGTCCTTAATGCTCATGTACCTGGCGGTGGGGTTGAAGAACTAGGTGCCGAGTTCATTGGACCTACCCAAGACCGTGTCCTCGCTCTAGCCCGACAACTCGGCCTTCAGACGTACCCAACATACACGGCCGGAAAGAATACCCTTTACCATAACGGCTCCAGAAACAACATATCAAGCTGA	MRFNHFCLLYISLSPLVSAELQHVDVAIVGGGLSDLAAAKDPAAAKKSFVVLEARDRVGGRVLNAHVPGGGVEELGAEFIGPTQDRVLALARQLGLQTYPTYTAGKNTLYHNGSRNNISS	MRFNHFCLLYISLSPLVSA	ELQHVDVAIVGGGLSDLAAAKDPAAAKKSFVVLEARDRVGGRVLNAHVPGGGVEELGAEFIGPTQDRVLALARQLGLQTYPTYTAGKNTLYHNGSRNNISS	120	19	101	1	0	hypothetical protein ASPCADRAFT_406442	OOF94551.1	IPR036188, IPR002937	GO:0055114	GO:0016491 oxidoreductase activity
152	CTACTTAGTGACGCAATCGTTGATGCATCCGGCGTATTCGGAACTGGCAAGTCCGACGCAGCCAACCAAAGCGACAGAGACGGCAGGAGTAAGGCCACCACCGGTGGCAACCTCAGCACCCAGAGCGATACCTGCACAAACAGCAGTCTTGGAGACCCAGGTGCCAGAGCAAATAGCGGCACAGGTTGTACACTGCTTCTGGGTGCCGTTGTTGCACTGAAGGAGCTTGCGTCTGTTGGAAGAGTCGCGAGTGGCCTGGCCCTGGGCAACAATGCTGTTGACCTGAGCCTTGGCAGTGGGACTGTCAGAACCCTTCTGGCGCTTGACGAGCTCAGAACGCTTGGAGCTCTTCTCGGAGTGGAGGGCTTCCTCGACCTGAGTCTTGACCACCTCGAAATA…	MLSPKAILSAIAIASIALVEASSVDNPALQKLAASLNVKVTDLLNLEETSEFSAEDLKKWTDIFEHSAANLDLFNVNEKITYFEVVKTQVEEALHSEKSSKRSELVKRQKGSDSPTAKAQVNSIVAQGQATRDSSNRRKLLQCNNGTQKQCTTCAAICSGTWVSKTAVCAGIALGAEVATGGGLTPAVSVALVGCVGLASSEYAGCINDCVTK	MLSPKAILSAIAIASIALVEA	SSVDNPALQKLAASLNVKVTDLLNLEETSEFSAEDLKKWTDIFEHSAANLDLFNVNEKITYFEVVKTQVEEALHSEKSSKRSELVKRQKGSDSPTAKAQVNSIVAQGQATRDSSNRRKLLQCNNGTQKQCTTCAAICSGTWVSKTAVCAGIALGAEVATGGGLTPAVSVALVGCVGLASSEYAGCINDCVTK	213	21	192	8	8	hypothetical protein DL764_007035	RYO98613.1	-	-	-
153	ATGAAGACTTCCTTGGCATTTGCTTCTTTTATAGCCTTCTCCTGTAGCTTGGCTAACGCCGCTCCGCCTTCCAACTACCTCAATTGGAAGACTTTTAAAGCTAATGGAGTTAACGTTGGTGGCTGGCTACATCAGGAAGCCGTAATTGATCCCACGTGGTGGAACCAGTATGCGCCTGGTACACCTGATGAGTGGGATTTTTGTGCAAAGCTCAAGTCGAAATGCGGTCCCATCTTAGAGCAGCGATACGGCTCTTACATCACGACCAAAGATATCGATACTATGGCTGCAGCCGGGATCAATGTCATCCGAGTGCCTACTGGGTATAATGCTTGGGTTACTGTTCCAGGATCCCAGCTTTATAGTGGCAACCAAGCTCGCTTTCTCAGAACCATCTCT…	MKTSLAFASFIAFSCSLANAAPPSNYLNWKTFKANGVNVGGWLHQEAVIDPTWWNQYAPGTPDEWDFCAKLKSKCGPILEQRYGSYITTKDIDTMAAAGINVIRVPTGYNAWVTVPGSQLYSGNQARFLRTISDYAIKKHGIHVILDIHSLPGGLNGMGLGEKEGNYGWFQNQTALDYSYQAVDAAIRFIQGSDVPQGFTLAPINEPVDNRDFTKFGTPEALTEEGAAWVLEYFQGVISRVEKANPKIPIMLQGGFRPVDFWAKYFAVSTNLVFDVHNYYFAGRPTTSQNLPEFICTDAKNTVSSTSPKFPVFVGEWSIQAATNNTFASRARNLNTGLKSWDSYTQGSAYWTWKFFGNEPVDGEGTQGDYWNYSDFVKMGIIDPSSGVTCK	MKTSLAFASFIAFSCSLANA	APPSNYLNWKTFKANGVNVGGWLHQEAVIDPTWWNQYAPGTPDEWDFCAKLKSKCGPILEQRYGSYITTKDIDTMAAAGINVIRVPTGYNAWVTVPGSQLYSGNQARFLRTISDYAIKKHGIHVILDIHSLPGGLNGMGLGEKEGNYGWFQNQTALDYSYQAVDAAIRFIQGSDVPQGFTLAPINEPVDNRDFTKFGTPEALTEEGAAWVLEYFQGVISRVEKANPKIPIMLQGGFRPVDFWAKYFAVSTNLVFDVHNYYFAGRPTTSQNLPEFICTDAKNTVSSTSPKFPVFVGEWSIQAATNNTFASRARNLNTGLKSWDSYTQGSAYWTWKFFGNEPVDGEGTQGDYWNYSDFVKMGIIDPSSGVTCK	391	20	371	5	4	hypothetical protein FOZG_17595	EWZ28723.1	IPR001547, IPR017853	GO:0005975	GO:0004553: Hydrolase activity, hydrolyzing O-glycosyl compounds
154	ATGGTACAACGACACTGGATCCTAACGTTGCCGACCCTTGTGCTGCAAGCAGCGCAAGGAGTTGTAGCTACTCCTGGCGTTGTTCATTTGCCTGTTCAGGTGAAGGGTGCTGACTCAAAAATAACAACCCGATCGGCTCCTAGACCTCATACCCTGTCTGCTTTCCATAACAACAAAGACCTCAACGCGCAAAGTTATATCATCGAAGTAGCAGCTGGCACACCGCCCCAGAAAATGAACCTGTTTCTAGACATAGGCAGATCGACAACATGTACAAACATTCTGTTGGCTTCCGCTATGCCTTTCACTAATTTTTAG	MVQRHWILTLPTLVLQAAQGVVATPGVVHLPVQVKGADSKITTRSAPRPHTLSAFHNNKDLNAQSYIIEVAAGTPPQKMNLFLDIGRSTTCTNILLASAMPFTNF	MVQRHWILTLPTLVLQAAQGVVA	TPGVVHLPVQVKGADSKITTRSAPRPHTLSAFHNNKDLNAQSYIIEVAAGTPPQKMNLFLDIGRSTTCTNILLASAMPFTNF	105	23	82	1	1	Candidapepsin-5	EMT72282	IPR021109	-	-
155	ATGGCCATATACCTCAGTCTGGCATGGCTCTTTTCATTGGTCCTGGCGCAGTCCAACCCTAACTCACTCACGCTTCCTTGGTCTGAAAGCTTCGGTCGTCCGTCAGGCTTCGACTACCATTGGTCCTTTGATACTAGCTCCATTCCGAGCGATCCTTTGCATCCCGCCAGACGGCTTCAATCTGGAGCTGAAATCAACGTTTTCAGAGGGTCGCTTGACGCAAACCCGAATCAGCCGGTTATTCACATCCATCTTGAATCTACTTCGTCTTCCCGGGATGTAATCTGGCAGGTCTATCACGGTGGGAACATTGTCGCTCTCTATAATTCAAGAGGCCAACGGTTCAACTCGCAACTGACGTCGACAACTTATGGGACATTTGCTATGATTCCATATGAG…	MAIYLSLAWLFSLVLAQSNPNSLTLPWSESFGRPSGFDYHWSFDTSSIPSDPLHPARRLQSGAEINVFRGSLDANPNQPVIHIHLESTSSSRDVIWQVYHGGNIVALYNSRGQRFNSQLTSTTYGTFAMIPYEAGMTITIYWRIDQGL	MAIYLSLAWLFSLVLA	QSNPNSLTLPWSESFGRPSGFDYHWSFDTSSIPSDPLHPARRLQSGAEINVFRGSLDANPNQPVIHIHLESTSSSRDVIWQVYHGGNIVALYNSRGQRFNSQLTSTTYGTFAMIPYEAGMTITIYWRIDQGL	148	16	132	0	0	hypothetical protein FOMG_19453	-	-	-	-
156	ATGTTCCTGGTCCCACATGCTCGAGTGGTGGTAATCACCTGGATCTTCATATCTTTTGTCCAAGCTGCGGTTATACAAGCAGCTTGTACCGGGATTGAGGTTTCCTCAGGCGACACCTGTGCATCTCTAGCGACTAAATGTGGCGTATCCGGCGATGCTTTCATGAGATTCAACCAGGTCCCAGACCTGTGTTCTACCCTTACACCTGGCCAGAATGTATGTTGCCCGGGTTCTGATGCCGAAGGGACCGCAGTGAAAGTCGATGGACGGGTTATCAGCGCGACGCAAACGAGTGACGCTCAGTCCAAGAATACGCAGAATCCAGATGACTGGCATTCTCAGCAGTGCACCGATGAGGTCATTATAGATGCTGCCATCGATCCCCAGAAGCGCTGGGAT…	MFLVPHARVVVITWIFISFVQAAVIQAACTGIEVSSGDTCASLATKCGVSGDAFMRFNQVPDLCSTLTPGQNVCCPGSDAEGTAVKVDGRVISATQTSDAQSKNTQNPDDWHSQQCTDEVIIDAAIDPQKRWDGVNCDDAWKDALVRWKNPTIEGQLSFPEAVSNFFHGPENLRCDITTDHNGCDTFRQCHDTNHPAGYLILNSMVALNNVGYMPFSLCKHLNISDLTKGHYELL	MFLVPHARVVVITWIFISFVQA	AVIQAACTGIEVSSGDTCASLATKCGVSGDAFMRFNQVPDLCSTLTPGQNVCCPGSDAEGTAVKVDGRVISATQTSDAQSKNTQNPDDWHSQQCTDEVIIDAAIDPQKRWDGVNCDDAWKDALVRWKNPTIEGQLSFPEAVSNFFHGPENLRCDITTDHNGCDTFRQCHDTNHPAGYLILNSMVALNNVGYMPFSLCKHLNISDLTKGHYELL	235	22	213	12	12	hypothetical protein V493_02827	KFY28640.1	IPR036779, IPR018392	-	-
157	TCACAGTAATAGGACCGGAGAACCCATTATGCTAAAGCATGCAGCCAAATTCCACTCCAAATTCAGCTCTCCTCGTCTGCTCCATACATGCTCTAGGATCCGGAGTGACTCTCCCACTAGGCCAAATGACTGTAGTGACCCCAAACCCGCCGCCAGATCCCTGAACTCTTTCTCCTGACTTGCATCGGCGACACAACCGGCAACGCAGAACGGCCACACAGAGCTGCGTAGGATCGCAGGGTCCTCGTGCTGTTGGAGCAGGCTCAACACCTCACCAGCGCTCTCGCGGATGGCCGGGAGGTGCGGCTGCCAACCGTGCGTCACTACTGCAAGGTATATGCGCGCAGCATATGCCCAGATGCGGGTCGCCGCGGCTTGCTTGGCGGTTTGGTTTGCATC…	MSLSTFFFTLILSSEDVSGHQVCRQNVWTQLEGYANTAIKSLQNEVLAINQQGSSTLLQQSRAMESIAQLMVLEMAMAKTSALSMHLGAAISLLEDILEHSKLNDKIDIRRAMAELERPSWVPLTTERPVWNTEQAALRFFFAILLWADIVSSTSVQTVPRLRKYYPNLICHEYGGATTEPLLRMEEYMGCEGWALIAIAETAALDVWKREEQANGTLAAEDLANRGDQIDGALQQGLKGLDGRCREREREPRRILQNFYLSSDANQTAKQAAATRIWAYAARIYLAVVTHGWQPHLPAIRESAGEVLSLLQQHEDPAILRSSVWPFCVAGCVADASQEKEFRDLAAGLGSLQSFGLVGESLRILEHVWSRRGELNLEWNLAACFSIMGSPVLLL	MSLSTFFFTLILSSEDVSG	HQVCRQNVWTQLEGYANTAIKSLQNEVLAINQQGSSTLLQQSRAMESIAQLMVLEMAMAKTSALSMHLGAAISLLEDILEHSKLNDKIDIRRAMAELERPSWVPLTTERPVWNTEQAALRFFFAILLWADIVSSTSVQTVPRLRKYYPNLICHEYGGATTEPLLRMEEYMGCEGWALIAIAETAALDVWKREEQANGTLAAEDLANRGDQIDGALQQGLKGLDGRCREREREPRRILQNFYLSSDANQTAKQAAATRIWAYAARIYLAVVTHGWQPHLPAIRESAGEVLSLLQQHEDPAILRSSVWPFCVAGCVADASQEKEFRDLAAGLGSLQSFGLVGESLRILEHVWSRRGELNLEWNLAACFSIMGSPVLLL	395	19	376	7	7	hypothetical protein FOVG_17908	EXA30746.1	IPR021858	-	-
158	TTATTCGAAACCCTCCCCACCTCTAAGAGACAGCGTACAACAGTCAGCAACCAGGACGCGGGTTGTCGTGCATGGCGATGAGCAGACACGTACCAACTTGGTCGTTGAAGGGGCATGATAGTTGGACACAGGCGGAGACGTTTGCTTGTAGTGGGATATCGGTGCAGACGCAATCTGCCAGATCGGCGATGCCGCATCCACCCTGCTGCAAGGCATTGGCGAGGCAAGGGAACTATTGTGGGCAGTCAGCCAGGGCCCTCGGATGCAAATTCCAATGCGTTCGTATTGCTCGAGATTGCAAGTTGCGGAGTAAGGGGAACTCACCGCACAATCCGGAACCAGACCTGGCAGCAGGTCTGTCGAGTTGGTGTTCTGGCTGAGGCCCGGAGTAGCCGTTGC…	MPSSKGYEASWPLILLSCIATATPGLSQNTNSTDLLPGLVPDCAVSSPYSATCNLEQYERIGICIRGPWLTAHNSSLASPMPCSRVDAASPIWQIASAPISHYKQTSPPVSNYHAPSTTKLVRVCSSPCTTTRVLVADCCTLSLRGGEGFE	MPSSKGYEASWPLILLSCIATATPGLS	QNTNSTDLLPGLVPDCAVSSPYSATCNLEQYERIGICIRGPWLTAHNSSLASPMPCSRVDAASPIWQIASAPISHYKQTSPPVSNYHAPSTTKLVRVCSSPCTTTRVLVADCCTLSLRGGEGFE	151	27	124	9	8	hypothetical protein BFJ68_g17695	RKK80746.1		-	-
159	ATGTTAGCACTCCTCATCGCCGTTATACTTCCGGCATTCAGTTGGCGAAATGGCCAATCGTTTTCAGATATCAATGGCGCCAGCGCTGGTGTCATTCAGAAACGCGAGATCAGCCCTACCAAGGTTTGCACACGATGGGGTCTTCAAGCTGCCCAGTTGAATGGAACACTCTACTTATATGGCGGTCGCTCAAGATCAAAACCCGACCAAGTCGAAGACACATGGAACAACAATTTTCTAACACTGGACCTCACTAAGGACTGGGATATAGGCTCGCCCGCTCTCAAAGGTCTCGAGAAACCGGACGGTCCTCCCGAGGTCTCTATGGGTTATTTGTGGCACGATTACAATAATCTGTATCTTTATGGCGGCCAATTCTCCGATACACCCTATGTTGAT…	MLALLIAVILPAFSWRNGQSFSDINGASAGVIQKREISPTKVCTRWGLQAAQLNGTLYLYGGRSRSKPDQVEDTWNNNFLTLDLTKDWDIGSPALKGLEKPDGPPEVSMGYLWHDYNNLYLYGGQFSDTPYVDPEPESVWRYSIKDEEWTEFKNPKTSAGNESEPGNRPVHRAAEGAGLSVPELGLSWYFGGHLDWATTPGWSRSVDRVYLKSLLEFTHPGYVNTGVDSLSDGTGAGESGAYRNITKAGIQTGNFTERADGVLVFVPGWGEQGVLIGLAGGTNETFTEDLGTLNVYDIANSEWFHQETSGDTPSVRVNPCAVIASAPDASSFQIYMFGGQNLPFVSCDMV	MLALLIAVILPAFSWRNGQS	FSDINGASAGVIQKREISPTKVCTRWGLQAAQLNGTLYLYGGRSRSKPDQVEDTWNNNFLTLDLTKDWDIGSPALKGLEKPDGPPEVSMGYLWHDYNNLYLYGGQFSDTPYVDPEPESVWRYSIKDEEWTEFKNPKTSAGNESEPGNRPVHRAAEGAGLSVPELGLSWYFGGHLDWATTPGWSRSVDRVYLKSLLEFTHPGYVNTGVDSLSDGTGAGESGAYRNITKAGIQTGNFTERADGVLVFVPGWGEQGVLIGLAGGTNETFTEDLGTLNVYDIANSEWFHQETSGDTPSVRVNPCAVIASAPDASSFQIYMFGGQNLPFVSCDMV	350	20	330	3	3	hypothetical protein FOXG_00242	XP_018232045.1
160	ATGCGGTTCGCTACTCTCCTCACTTGCTGGGCGCCAGTAGCTTCATGCGCAGTCTGGAACATTGAAGGCTCATGTTATCGCAGCGTTTGCGCGGTTACCCCCATTGTAGCCGACCCAGCCACAGTTTGCGGTGGTAAGGCTGGGGGATACGCAGGAGATGGCCACAAGGGAAGAACGAGCTGTACTGACGAAGGCTATCCTTGCACTTACGTTTGGAGGTGCTAG	MRFATLLTCWAPVASCAVWNIEGSCYRSVCAVTPIVADPATVCGGKAGGYAGDGHKGRTSCTDEGYPCTYVWRC	MRFATLLTCWAPVASC	AVWNIEGSCYRSVCAVTPIVADPATVCGGKAGGYAGDGHKGRTSCTDEGYPCTYVWRC	74	16	58	8	6	hypothetical protein BFJ71_g3848	RKL03878.1	-	-	-
161	ATGAAGACCACTTCCGCTGGATTCGTGTTCACGTCGGCTGTGCTGGCTGGACTCGCTCATGCAATCGGTATGGCACCGCCGCCGCCTGTTGAGCTTGTGCAGGGCTTCGACTGGAAGGACCCCTTTGCTCTCGATGCCATGGCCTCATTCCGACCTACCTGCGAGGCCAAGGCTCAGTTTGAAGCTCTCGAGTACACCCTCAAAGACTTGATGGAACCTCCTCCCAAGGGGTTGAAGCCATGGTCGAAGGGCCTGAAGGCGGTCTTCGCTGATAAAGAATACCCTGGAGGGTGGCTGGGTCTCGATCCTCACCTTAATGGCCGAAGTCTGCTGCTGATGAACTACGATCAAATGCCTCTCCTGGTTCGCAGGTGGATTGAACAACAGGAACGGACTGAT…	MKTTSAGFVFTSAVLAGLAHAIGMAPPPPVELVQGFDWKDPFALDAMASFRPTCEAKAQFEALEYTLKDLMEPPPKGLKPWSKGLKAVFADKEYPGGWLGLDPHLNGRSLLLMNYDQMPLLVRRWIEQQERTDGKGKALFAVLEKPKNDEDEIEKVVQFPEADKIDRDNDKDKVAIFAPGALYGILPLWTAGTSKCEGMPPDSANRLKQLLTLK	MKTTSAGFVFTSAVLAGLAHA	IGMAPPPPVELVQGFDWKDPFALDAMASFRPTCEAKAQFEALEYTLKDLMEPPPKGLKPWSKGLKAVFADKEYPGGWLGLDPHLNGRSLLLMNYDQMPLLVRRWIEQQERTDGKGKALFAVLEKPKNDEDEIEKVVQFPEADKIDRDNDKDKVAIFAPGALYGILPLWTAGTSKCEGMPPDSANRLKQLLTLK	214	21	193	2	2	hypothetical protein BFJ69_g7789	RKK75359.1	-	-	-
162	ATGAAGCTTTCTCTTTTTCCCGCCCTCGCTATTGCTGCTGCATCACGAGTTATAGCAACAACTTGTGCAATAACAGATGCCTCTGGGACCAATGAATCTACTGGTATTGCCGATTGGGACGGAAAATATGACACTCACAACTACGACTTTTGGTACTCTCGACCCTCTCCTGGCACGCAAACCGGAGTTTTGCGACTTGCAAACATTTCGGGCCATCGTAGGATTATTTGCGTTGCAGGGCCTCAAACCAACGATCAATGCTTCTGGATCAATGCAGGCGACGAATGCACCGTGAGATTGGGTCTCACGCGAGTGTCTTCCTATTCTATGTACTCGGCTTGA	MKLSLFPALAIAAASRVIATTCAITDASGTNESTGIADWDGKYDTHNYDFWYSRPSPGTQTGVLRLANISGHRRIICVAGPQTNDQCFWINAGDECTVRLGLTRVSSYSMYSA	MKLSLFPALAIAAASRVIA	TTCAITDASGTNESTGIADWDGKYDTHNYDFWYSRPSPGTQTGVLRLANISGHRRIICVAGPQTNDQCFWINAGDECTVRLGLTRVSSYSMYSA	113	19	94	4	4	hypothetical protein FOTG_19220	EXM12279.1	-	-	-
163	TTAGCGTTGTTCTCGCAGCCACAGCTTCAGTGTCAGTTGACTGCGGCTAGCTGCAAGCCTTCCTTGCGTTGTGCATGTAAGTGACAAGTCAGCGACGGACCGTAGATTGTGAGGCAGAGAAGAAGAAAGAAGGAAGACAAGAATGGAATAGAAAAAGCAATATGAATACAT	MYSYCFFYSILVFLLSSSLPHNLRSVADLSLTCTTQGRLAASRSQLTLKLWLREQR	MYSYCFFYSILVFLLSSSLP	HNLRSVADLSLTCTTQGRLAASRSQLTLKLWLREQR	56	20	36	2	1	no hit	-	-	-	-
164	ATGTTCGTCTGTCAAGTCATCCTCATGCTCTCAGGCTTCGTCCTCACCGATGGTTTCGACGACCTTGCTGTAATGGGTCTATGCTACATCCAAATCTCAACAGCATGGGCGGTATCTCTTGGCATGATCGCCGCATTTGTCTGGAACAGCGCTATGATGTTGATGACCGCTCAATGGTTCCTCGTTCGTCGTGCAAGACCTGAGCGAGGCAGTGCAAACACCAATAAGATGTGGAGGCTCGTGCAGTTTCGACGTCGACCAGCGCCTTCACCACCACAGGAGATGGAAGCCTACAGTGGGGGGCAATAA	MFVCQVILMLSGFVLTDGFDDLAVMGLCYIQISTAWAVSLGMIAAFVWNSAMMLMTAQWFLVRRARPERGSANTNKMWRLVQFRRRPAPSPPQEMEAYSGGQ	MFVCQVILMLSGFVLTDG	FDDLAVMGLCYIQISTAWAVSLGMIAAFVWNSAMMLMTAQWFLVRRARPERGSANTNKMWRLVQFRRRPAPSPPQEMEAYSGGQ	102	18	84	2	1	hypothetical protein FLONG3_1597	RGP80296.1	-	-	-
165	ATGAACTTCAAGCTCTTGCTGCTTCTTGGTTCAACGACTGCCTCAGCGCAGAGGATTCTGGGCTGCACTATGAAAAATAAGCAATTGAATCCTAGTCCCAACATTTGTGTACAAGCGCACGGCACGTTTATCCCAAGTATCTCAGTAAGAAGCTCTACTACAACTCGTGCTTCTATATCTAACTCCACGTTTAGGGATGCTGTACCAGAGATACGAGCAACAGAAATAGTGCTGCTCTAG	MNFKLLLLLGSTTASAQRILGCTMKNKQLNPSPNICVQAHGTFIPSISVRSSTTTRASISNSTFRDAVPEIRATEIVLL	MNFKLLLLLGSTTASA	QRILGCTMKNKQLNPSPNICVQAHGTFIPSISVRSSTTTRASISNSTFRDAVPEIRATEIVLL	79	16	63	2	2	Six14	AGG54055.1	-	-	-
166	ATGGCTGAAGTTATCGGCCTTTTATCTGGTCTTCTGACCTTGGCGGCCGTTGCCCATAAATCTGTCATCAAGGTTCAGGAGATAGTACAAAGCTTCCAATGCCTCCCACGTCAATCTAGAGAACTACTTTCGGAGTTAGCAGAGTTGAGTACGGTGCTCAAAGACCTTTCTCAGGCACCTCGCGGTGACGTTGAGGTGGACCTTTCGGCCCTCCGAATAACGCTGGAACAGTGCAGCCGTTCGTGCGAGGATTTTGAGCGAGAGCTAAAAGCCTGTAGTTCGCGGTCTAGCCAAGATCGAACTAGTTTTCGGGACTGGGCTAAGCTCACATACAGGGGCGGAAATGGAATTGAAGGCTTTAGACAGCAGCTCATTGGATACAAGTCTACAATCGTCGTC…	MAEVIGLLSGLLTLAAVAHKSVIKVQEIVQSFQCLPRQSRELLSELAELSTVLKDLSQAPRGDVEVDLSALRITLEQCSRSCEDFERELKACSSRSSQDRTSFRDWAKLTYRGGNGIEGFRQQLIGYKSTIVVALSFANL	MAEVIGLLSGLLTLAAVA	HKSVIKVQEIVQSFQCLPRQSRELLSELAELSTVLKDLSQAPRGDVEVDLSALRITLEQCSRSCEDFERELKACSSRSSQDRTSFRDWAKLTYRGGNGIEGFRQQLIGYKSTIVVALSFANL	140	18	122	4	4	hypothetical protein BFJ63_vAg17239	RYC79881.1	IPR031348	-	-
167	ATGCGCTTCGCCACTATCATCACTTTCTTAGTGCCTCTAACTCTGGGCAAAATTTGGAACTTGAGAGGCACCTGTGCCGATGACCACACATGCGTGATCACCCGCTCTGTCGTTGACCCGGTCCAAGTTTGTGATCACAAGGCCGGGCGATATGCCGGAACAGGGAAAGGCGGGAAAACAAGCTGTACCGGTCCTGCCACCTATTGTACTTACGTTTGGGAGTGCTAG	MRFATIITFLVPLTLGKIWNLRGTCADDHTCVITRSVVDPVQVCDHKAGRYAGTGKGGKTSCTGPATYCTYVWEC	MRFATIITFLVPLTLG	KIWNLRGTCADDHTCVITRSVVDPVQVCDHKAGRYAGTGKGGKTSCTGPATYCTYVWEC	75	16	59	6	6	hypothetical protein CSPAE12_01750	OHW99597.1	-	-	-
168	ATGCGTTTGTCCAGCTTTTTGCTGGCCGCTGGTCTTTCCAGCTCTGCACTCGCCGTCGATGCATCGCTGGATCCTTGGGACATTGACCCTAGCTGCAATGGCTTTGAGAACGACATCAAGGATGCTCTGACGCAGTCAATTGATCTTGCTGATGCTGCTAGAACCAGTCTTGAGTTTCTTCTTGCAAAGATGCCGGACCGAAACTCTGATCCCGACGGTGCTGTCAAGTGGGCGAGAATCTCGTCGGCTGCTAATAGCATCTTTGGCCTCATGCCTAACTACAAGGGTCATAATGCTGAGACGCAGAAGTACATTGAGGATTTGAGAGGTTTGTTGAACTCTTCTTAA	MRLSSFLLAAGLSSSALAVDASLDPWDIDPSCNGFENDIKDALTQSIDLADAARTSLEFLLAKMPDRNSDPDGAVKWARISSAANSIFGLMPNYKGHNAETQKYIEDLRGLLNSS	MRLSSFLLAAGLSSSALA	VDASLDPWDIDPSCNGFENDIKDALTQSIDLADAARTSLEFLLAKMPDRNSDPDGAVKWARISSAANSIFGLMPNYKGHNAETQKYIEDLRGLLNSS	115	18	97	1	1	hypothetical protein BFJ68_g1250	RKL23044.1	-	-	-
169	ATGTCTTTGTCAGGGGTAGTCGTAACATGGTTGGCTTGGCTCTTTTCAATTTGCAATGCTTCCCATTATTTCACCTTGAGGCCAAATGAGGCGTATCCTCCCGGGCGTAATAAGTTCATTCATATTTCACCTTGCCTTGAACTGATGCTCAGCGTCTTTATCCAAGTCTGA	MSLSGVVVTWLAWLFSICNASHYFTLRPNEAYPPGRNKFIHISPCLELMLSVFIQV	MSLSGVVVTWLAWLFSICNA	SHYFTLRPNEAYPPGRNKFIHISPCLELMLSVFIQV	56	20	36	2	1	hypothetical protein DOTSEDRAFT_110593	EME41027.1	-	-	-
170	ATGATGATAGTGATCAGTACACTGACTTGGTACATCTTGGGTTTCGTAGACTCTCTGGTGGAACCCATTCATGAAGAAGCCAGCTACTGGCTAGCTGAACGTATTCCGTTAGGTAGCAGGACCGAGGTCAGGGCATACGAGACTATGGTTCGCATCATTGCGGCTACGGCTTCAAGAATGCTCGGCGGGAAGTCGTGCAGCCGGAACCCAGAATGGCTCGAGACCGCAGCTCTATACTCGATGGATGTTGTCAGCGTTGCTGTAAAGCTGCGGCCATACCCGGCCTTCCTGCGGCCCTTCATTACCCCTTGGCTAGAAGGGACCAAAAAGCTCAAACGTCATCTTGAGGCTGCCAACGATACTTTCTCCGAGACTATTTCCCGACGACTTCAAGTGAAT…	MMIVISTLTWYILGFVDSLVEPIHEEASYWLAERIPLGSRTEVRAYETMVRIIAATASRMLGGKSCSRNPEWLETAALYSMDVVSVAVKLRPYPAFLRPFITPWLEGTKKLKRHLEAANDTFSETISRRLQVNEQQQDQEMINGKTVVDKPVDMVQWLVDSAAGSDRDAGVLSHNMLFMSLAAVHTSSATTIHALFDLCAHPEYIEPIRNEVETEIANHGWTLSAIANMKKLDSFIKESQRLNQAVLMTFNRKVARVLRFEDGTTLGPGTYITMPSDSVSRDPDIYDDPERFDGYRFYERRKGGGRDTNRHQFASTGPESLAFGQGKNACPGRFFAGMQIKVVLANVLINYDISFPPGQTERPKNLYKGGLVRPDPRQKLLFLPRGCKTGSSC	MMIVISTLTWYILGFVDS	LVEPIHEEASYWLAERIPLGSRTEVRAYETMVRIIAATASRMLGGKSCSRNPEWLETAALYSMDVVSVAVKLRPYPAFLRPFITPWLEGTKKLKRHLEAANDTFSETISRRLQVNEQQQDQEMINGKTVVDKPVDMVQWLVDSAAGSDRDAGVLSHNMLFMSLAAVHTSSATTIHALFDLCAHPEYIEPIRNEVETEIANHGWTLSAIANMKKLDSFIKESQRLNQAVLMTFNRKVARVLRFEDGTTLGPGTYITMPSDSVSRDPDIYDDPERFDGYRFYERRKGGGRDTNRHQFASTGPESLAFGQGKNACPGRFFAGMQIKVVLANVLINYDISFPPGQTERPKNLYKGGLVRPDPRQKLLFLPRGCKTGSSC	393	18	375	5	5	hypothetical protein FOCG_18259	EXL39125.1	IPR001128, IPR002403, IPR036396	GO:0055114	GO:0016705: Oxidoreductase activity, acting on paired donors, with incorporation or reduction of molecular oxygen
171	TTAACAAGTGAGCTTTATGTTCTGGATCTTTCCTATAAGGTTCAACGGGCAGGACAAGCCAGGCTCATATGAAAAGCTATTCCAGCAGTTTCTCCGGGTTTGGGGATCCCAGAACTGGACTGCGAAGTTCACTTTGTAGTTTACCAAGTTCGTAAACGTATATTTCCACCCTGAGTCCCACCACCCCGAGTCGATGCTCCTCAATTCAGCCGAAAGTGTCTGTAGGCCAGCCAGGACTTTTCGACCGACAGCTGTCGGGCCTGGGTAAGATTCGCAAGGGAGGGGGTTATTGCCCTGGCCTTCCCCGACTGGGTAACAGTCAGCATTGGCGCCGGCAAACAATGCGGCCAGGGTGGTGACGAAGGAAACGAACTGTAATTGCAT	MQLQFVSFVTTLAALFAGANADCYPVGEGQGNNPLPCESYPGPTAVGRKVLAGLQTLSAELRSIDSGWWDSGWKYTFTNLVNYKVNFAVQFWDPQTRRNCWNSFSYEPGLSCPLNLIGKIQNIKLTC	MQLQFVSFVTTLAALFAGANA	DCYPVGEGQGNNPLPCESYPGPTAVGRKVLAGLQTLSAELRSIDSGWWDSGWKYTFTNLVNYKVNFAVQFWDPQTRRNCWNSFSYEPGLSCPLNLIGKIQNIKLTC	127	21	106	5	5	hypothetical protein BFJ63_vAg18985	RYC78140.1	-	-	-
172	CTACTTAGCTGAGCATAAGTATGGCCCAAAGTAGCCACACCTGATAGAGTAAGTTGTCCCATCTGCAGCCTTGTCATAGTCACGGGTGCCGCCGCGAGCGCCTCGGCAAATGGTGCATCGATTGACAGGGTTGTCACCATAAGTAATGCCAGCTTCAAGTGTCCGCCCTCCAGGACGGCTAATTTGACCGCCAATGTCATGTGTACATATTTTGCTGGCCGTGGCCCTCCGTCTTTCATTGAGGCCTGGATCAGTTTCGACAAAAGCCTTGTATGAGCCCTTATTTTTTACTACATCACCAACGTAGTCATAATAAACTGCACAATCTTTGGCTAAGCCAAGGATTGGCAGGACAGCGAAAATGCCAAAAGTTGAGATACGCATACTGACTGACAT	MSVSMRISTFGIFAVLPILGLAKDCAVYYDYVGDVVKNKGSYKAFVETDPGLNERRRATASKICTHDIGGQISRPGGRTLEAGITYGDNPVNRCTICRGARGGTRDYDKAADGTTYSIRCGYFGPYLCSAK	MSVSMRISTFGIFAVLPILGLA	KDCAVYYDYVGDVVKNKGSYKAFVETDPGLNERRRATASKICTHDIGGQISRPGGRTLEAGITYGDNPVNRCTICRGARGGTRDYDKAADGTTYSIRCGYFGPYLCSAK	131	22	109	6	6	hypothetical protein FOZG_17668	EWZ28663.1	-	-	-
173	ATGTGTGCACATTATATGCTAAGGACTCTCCTGGTTTTCTGCCCAAGCTTTTTTACCCTCTGCAATTACAGTGCCGGTCCAATTCCGATCCTGCTCACTCGGATATCCGCCAACTCCTTTATCGGCAGGCCATCGGGCGATATTCTGAGTAAGACATCAAGACGTTCATCGAATGCATTGACTGAGTCAATAGCTTTGGCGCAAGAGACATCGCAAGTCCCTCACACCCTTACGAATTGCAGTTATACAATATGTGCGGCTCCCATGGGTTAA	MCAHYMLRTLLVFCPSFFTLCNYSAGPIPILLTRISANSFIGRPSGDILSKTSRRSSNALTESIALAQETSQVPHTLTNCSYTICAAPMG	MCAHYMLRTLLVFCPSFFTLC	NYSAGPIPILLTRISANSFIGRPSGDILSKTSRRSSNALTESIALAQETSQVPHTLTNCSYTICAAPMG	90	21	69	5	2	no hit	-	-	-	-
Effector candidates newly identified from 45 endophyte genomes
